# Supplementary material for: Diminished α7 nicotinic acetylcholine receptor (α7nAChR) rescues amyloid-β induced atrial remodeling by oxi-CaMKII/MAPK/AP-1 axis-mediated mitochondrial oxidative stress
Source: PubMed Central journal article supplement — Redox Biol. 2023 Jan 2;59:102594. doi: 10.1016/j.redox.2022.102594 (PMC9813735; doi:10.1016/j.redox.2022.102594), 2023-01-02

# Fig.1

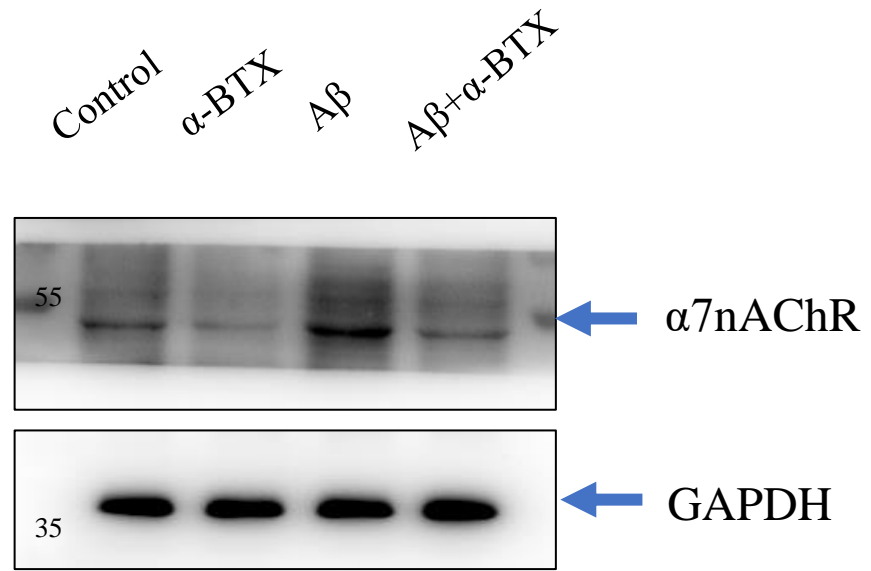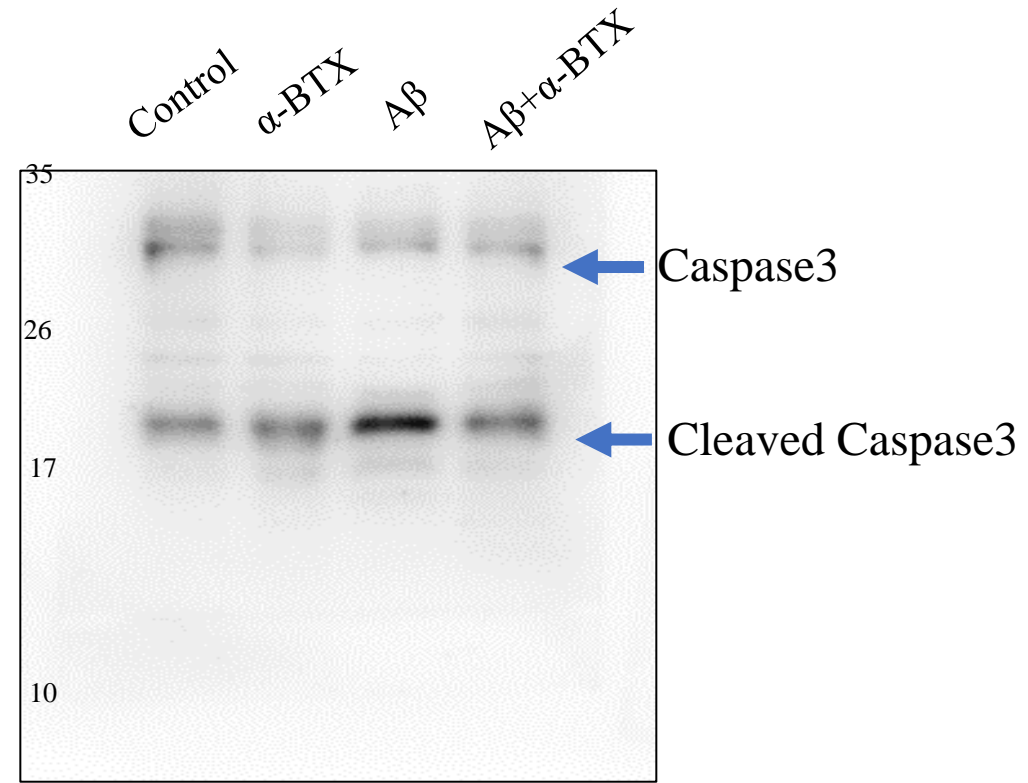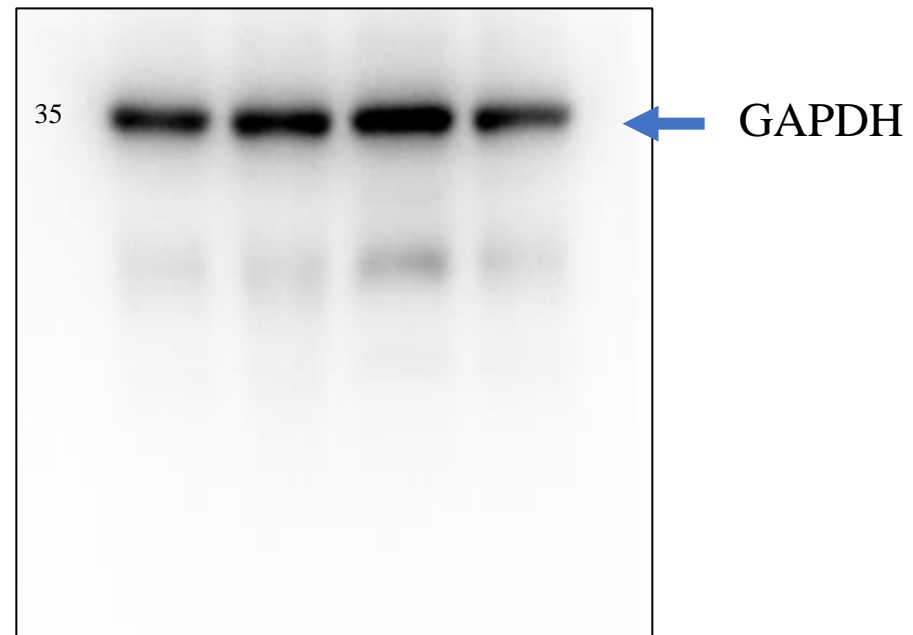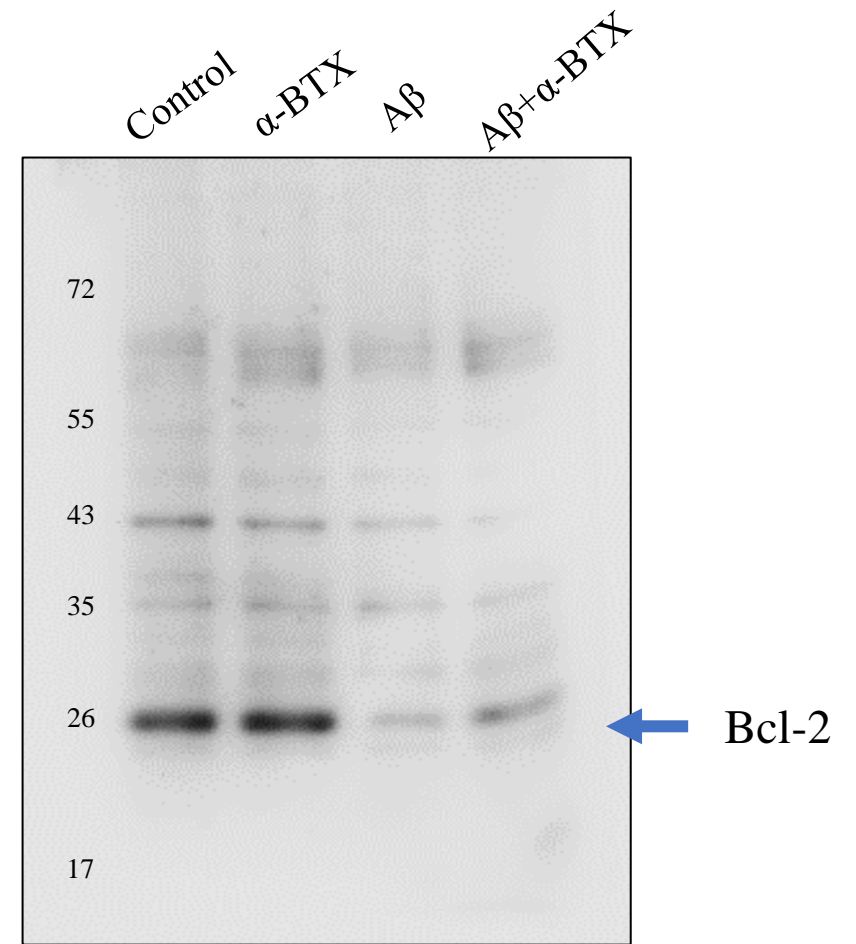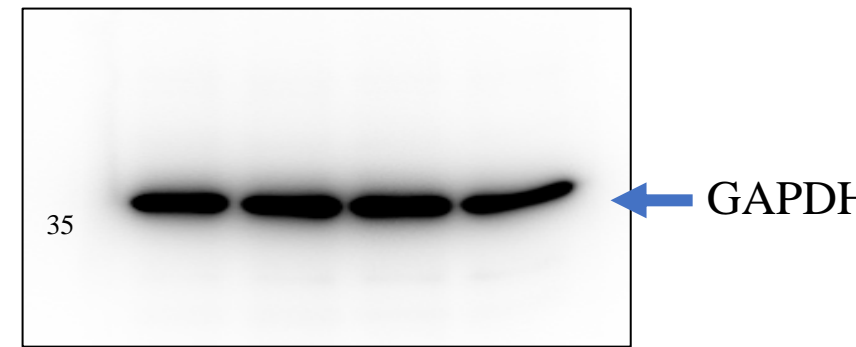

**Fig.3**

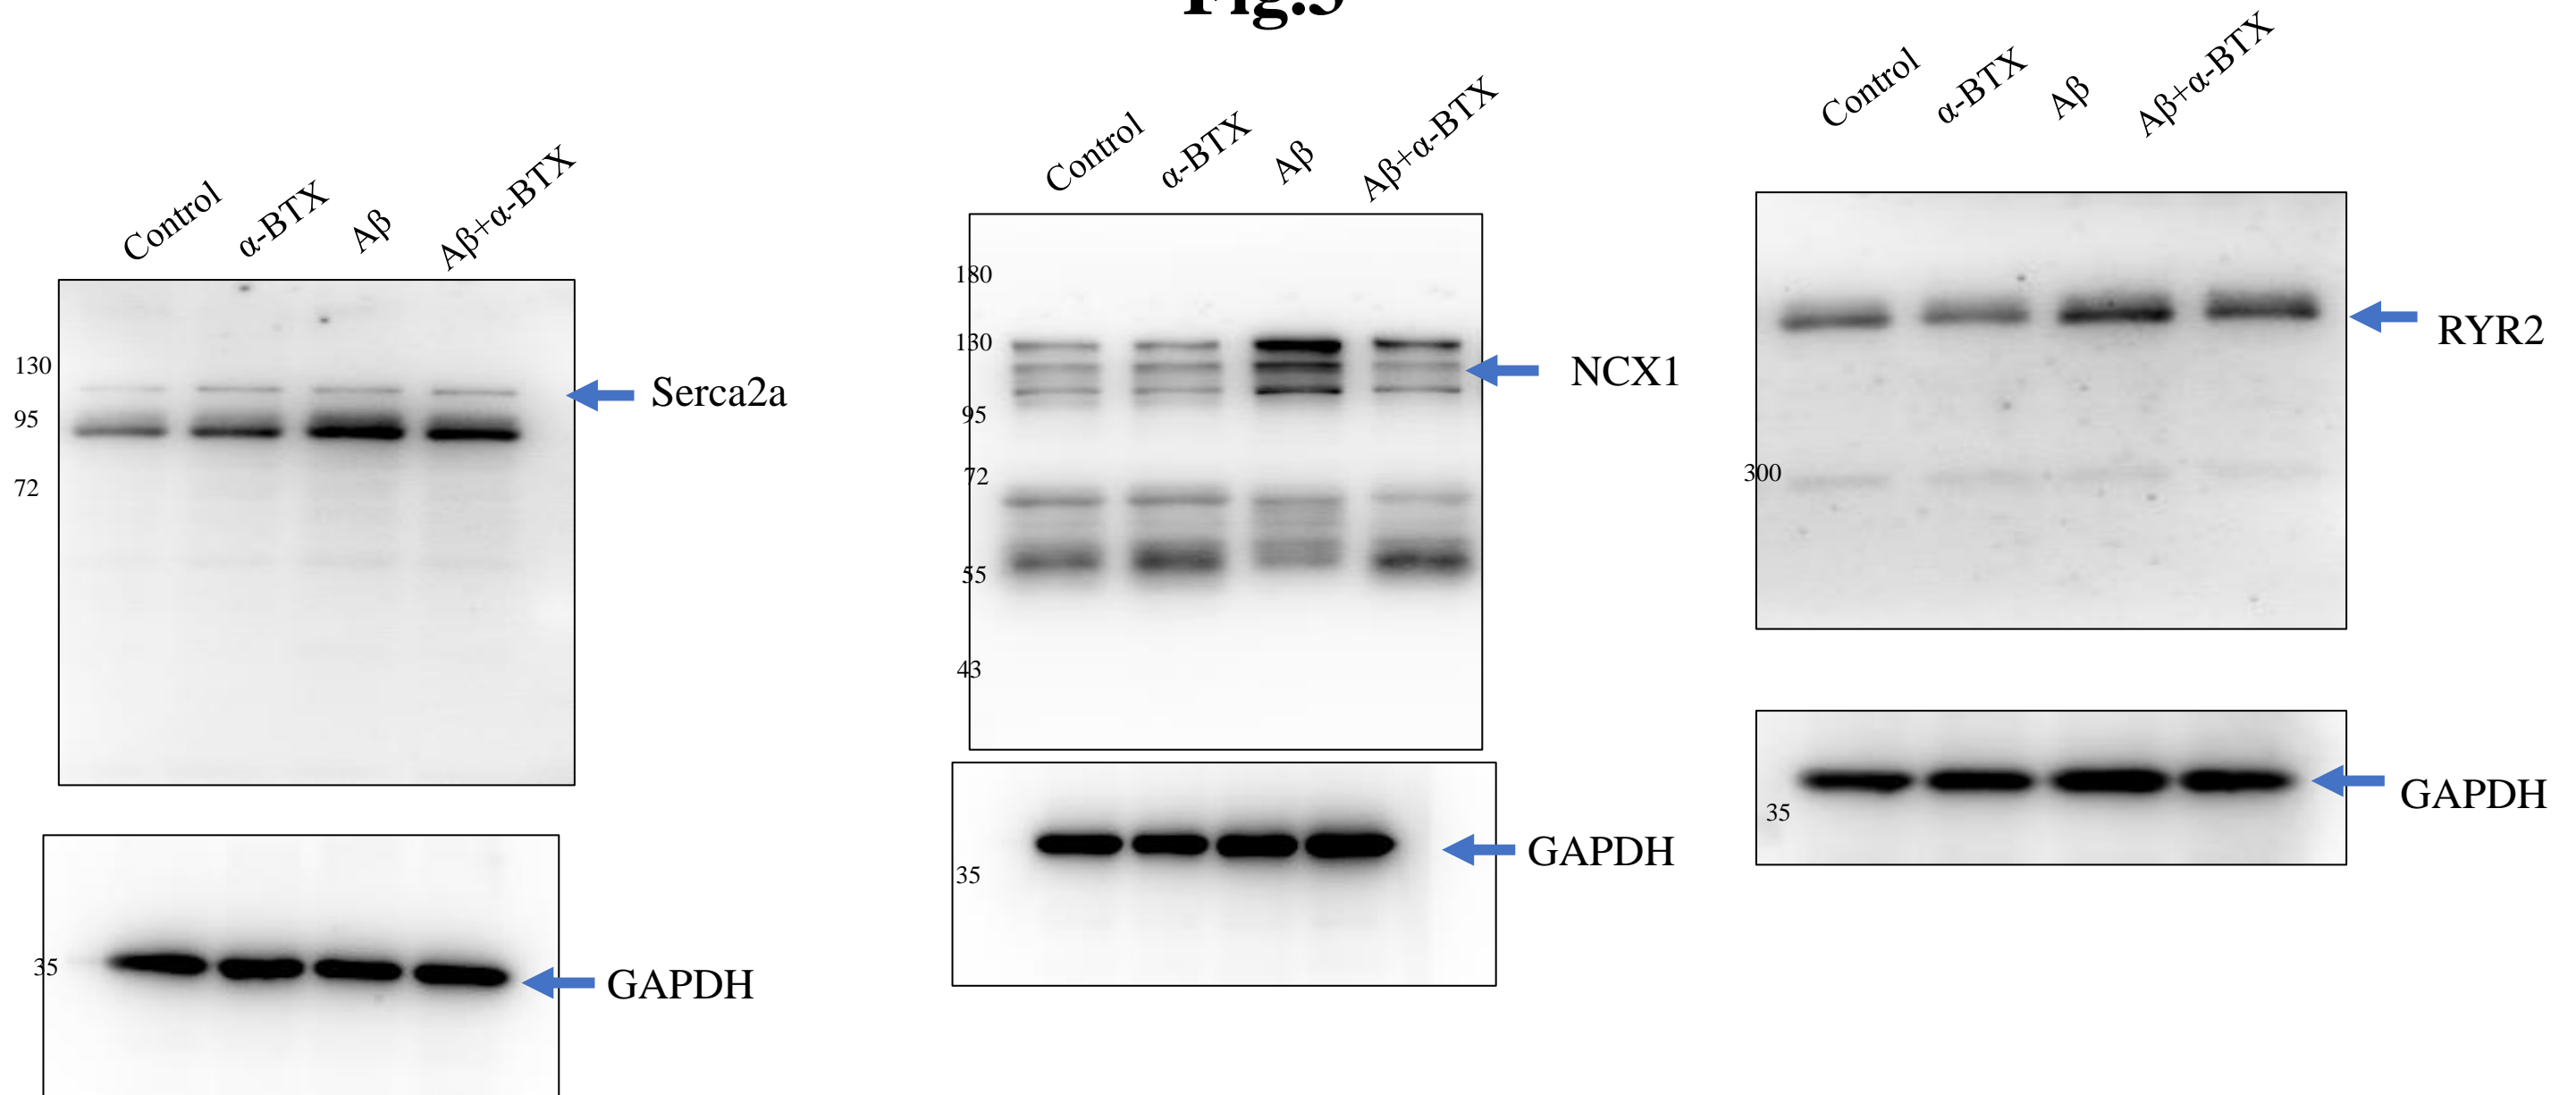

**Fig.3**

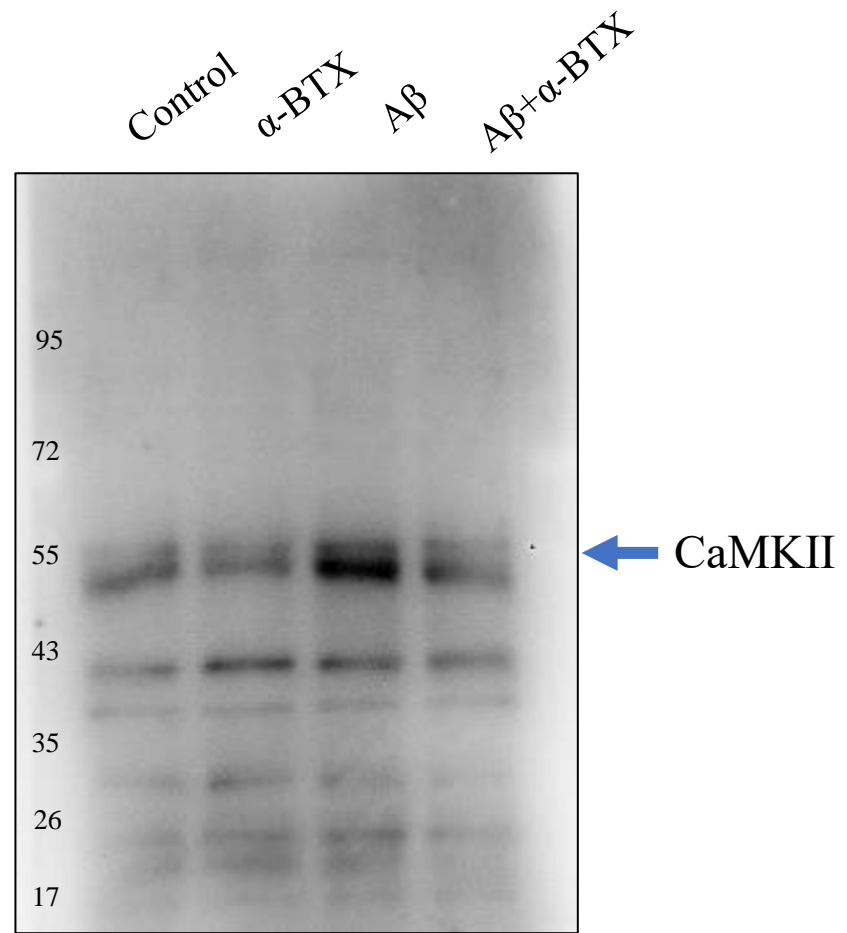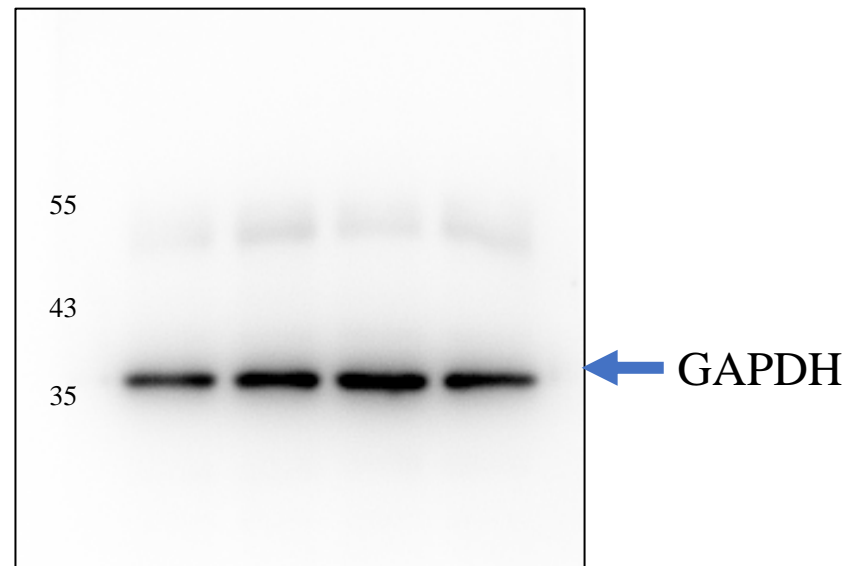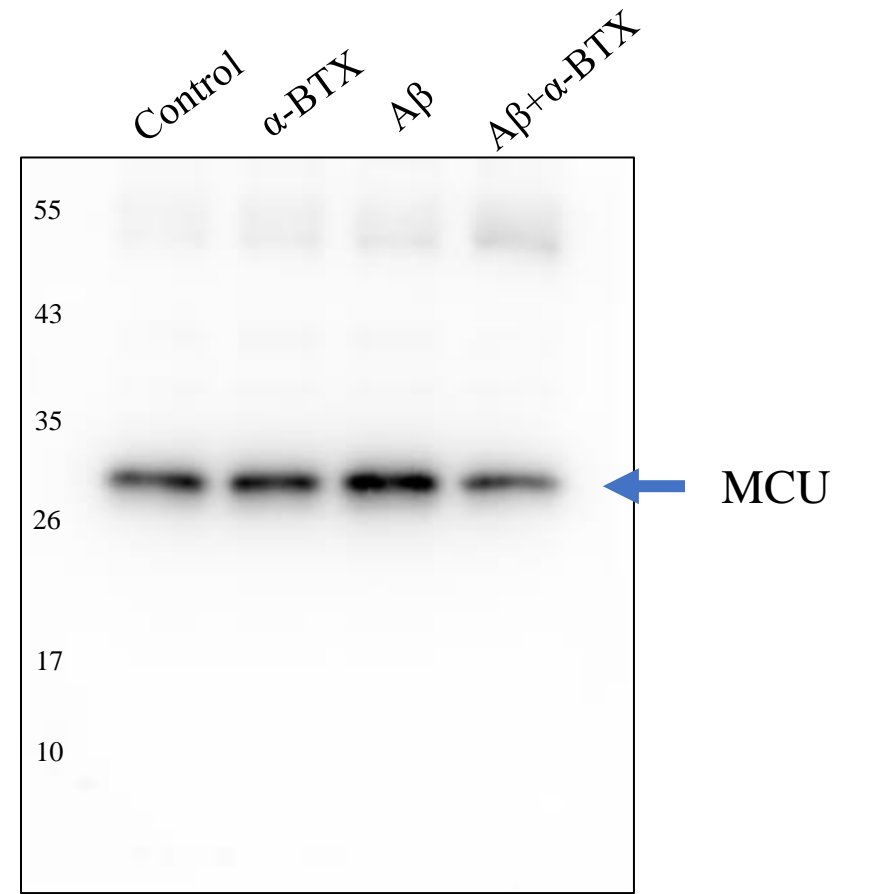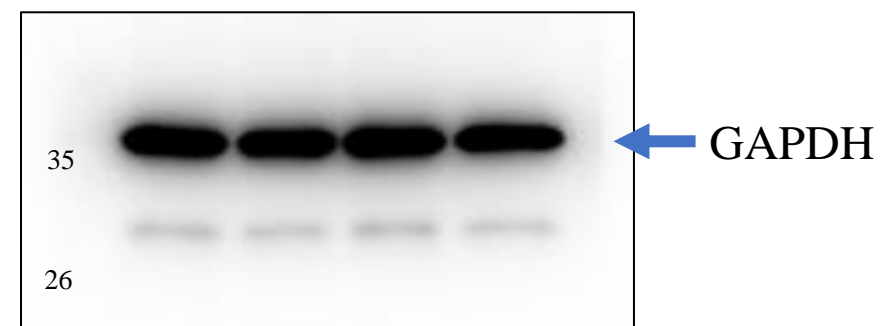

# Fig.4A

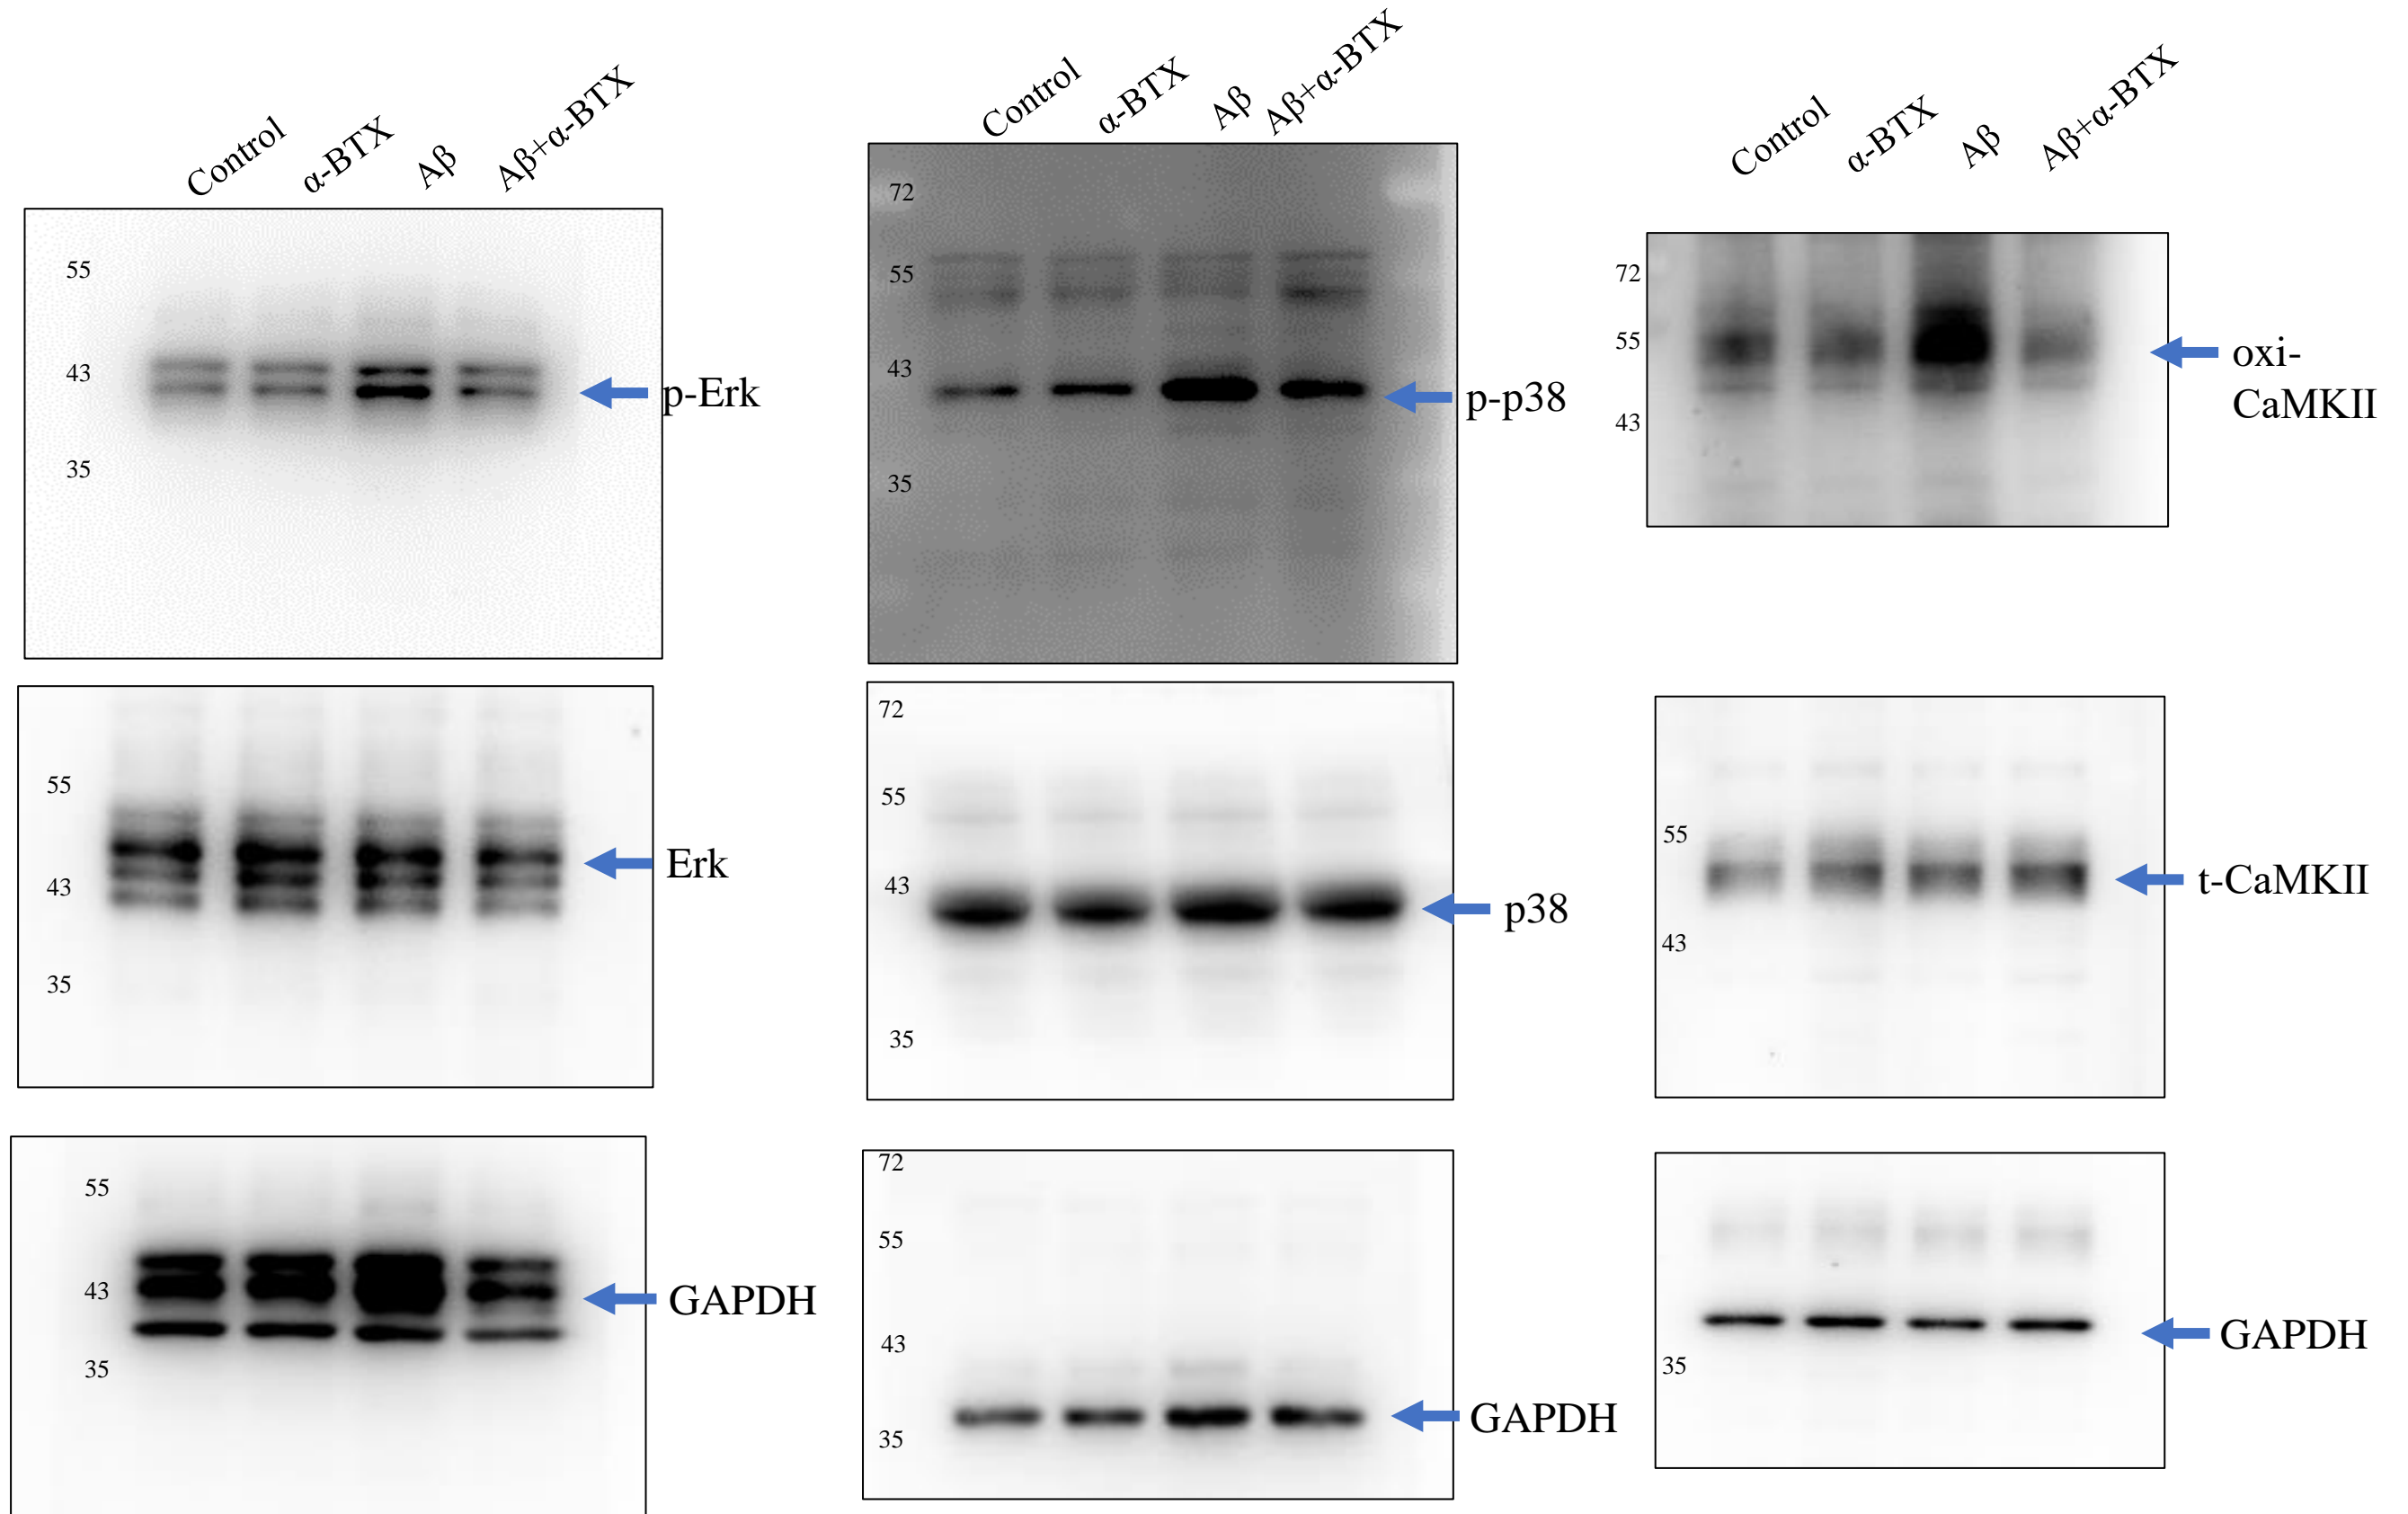

# Fig.4E

A $\beta$       A $\beta$       A $\beta$       A $\beta$       A $\beta$   
 $\alpha$ -BTX     $\alpha$ -BTX     $\alpha$ -BTX     $\alpha$ -BTX     $\alpha$ -BTX  
oCaMKII    AngII    siCaMKII

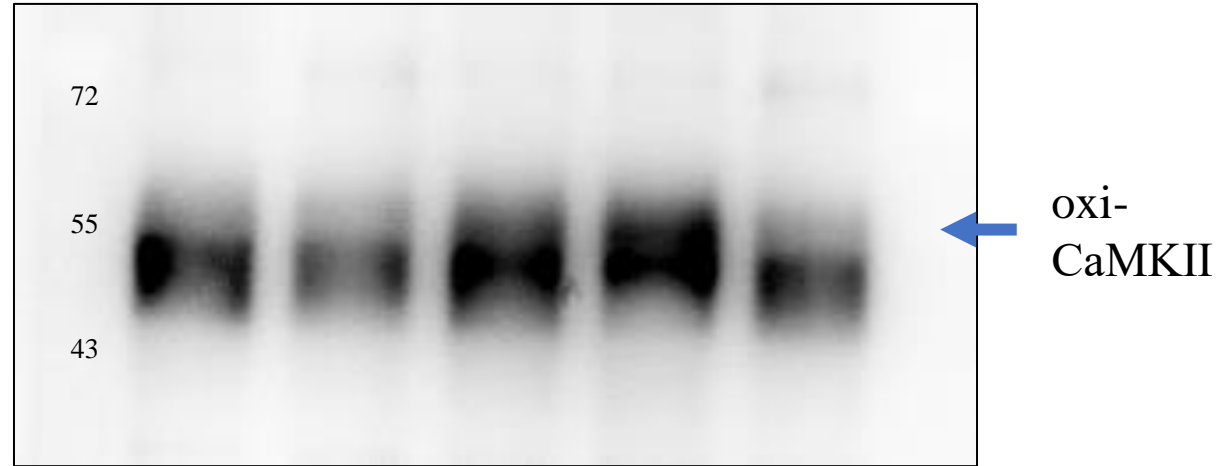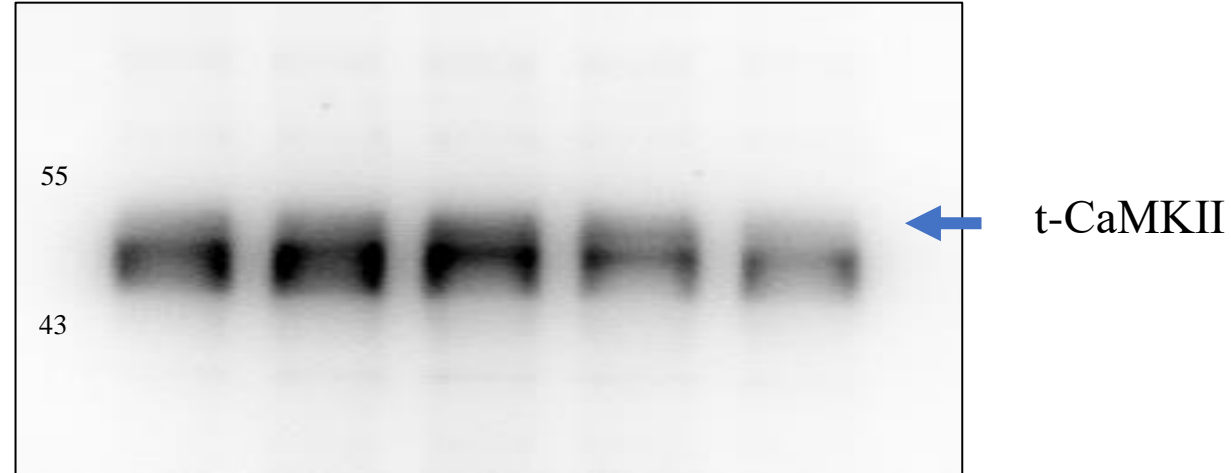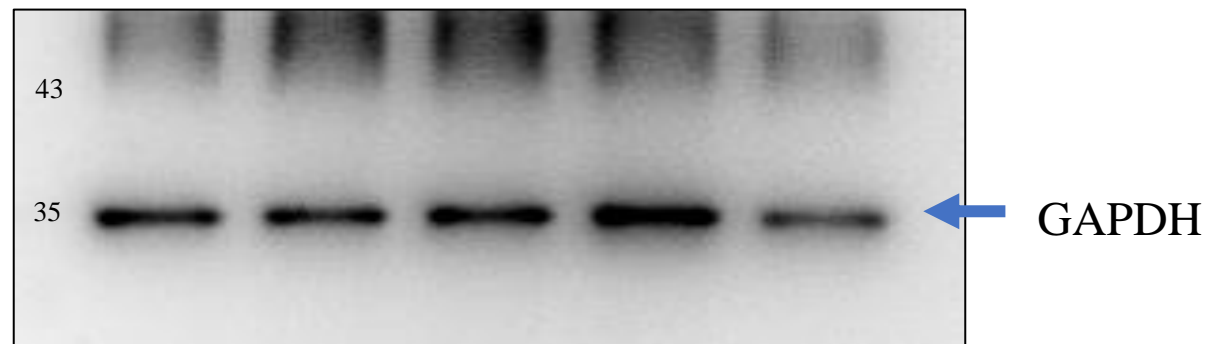

# Fig.4E

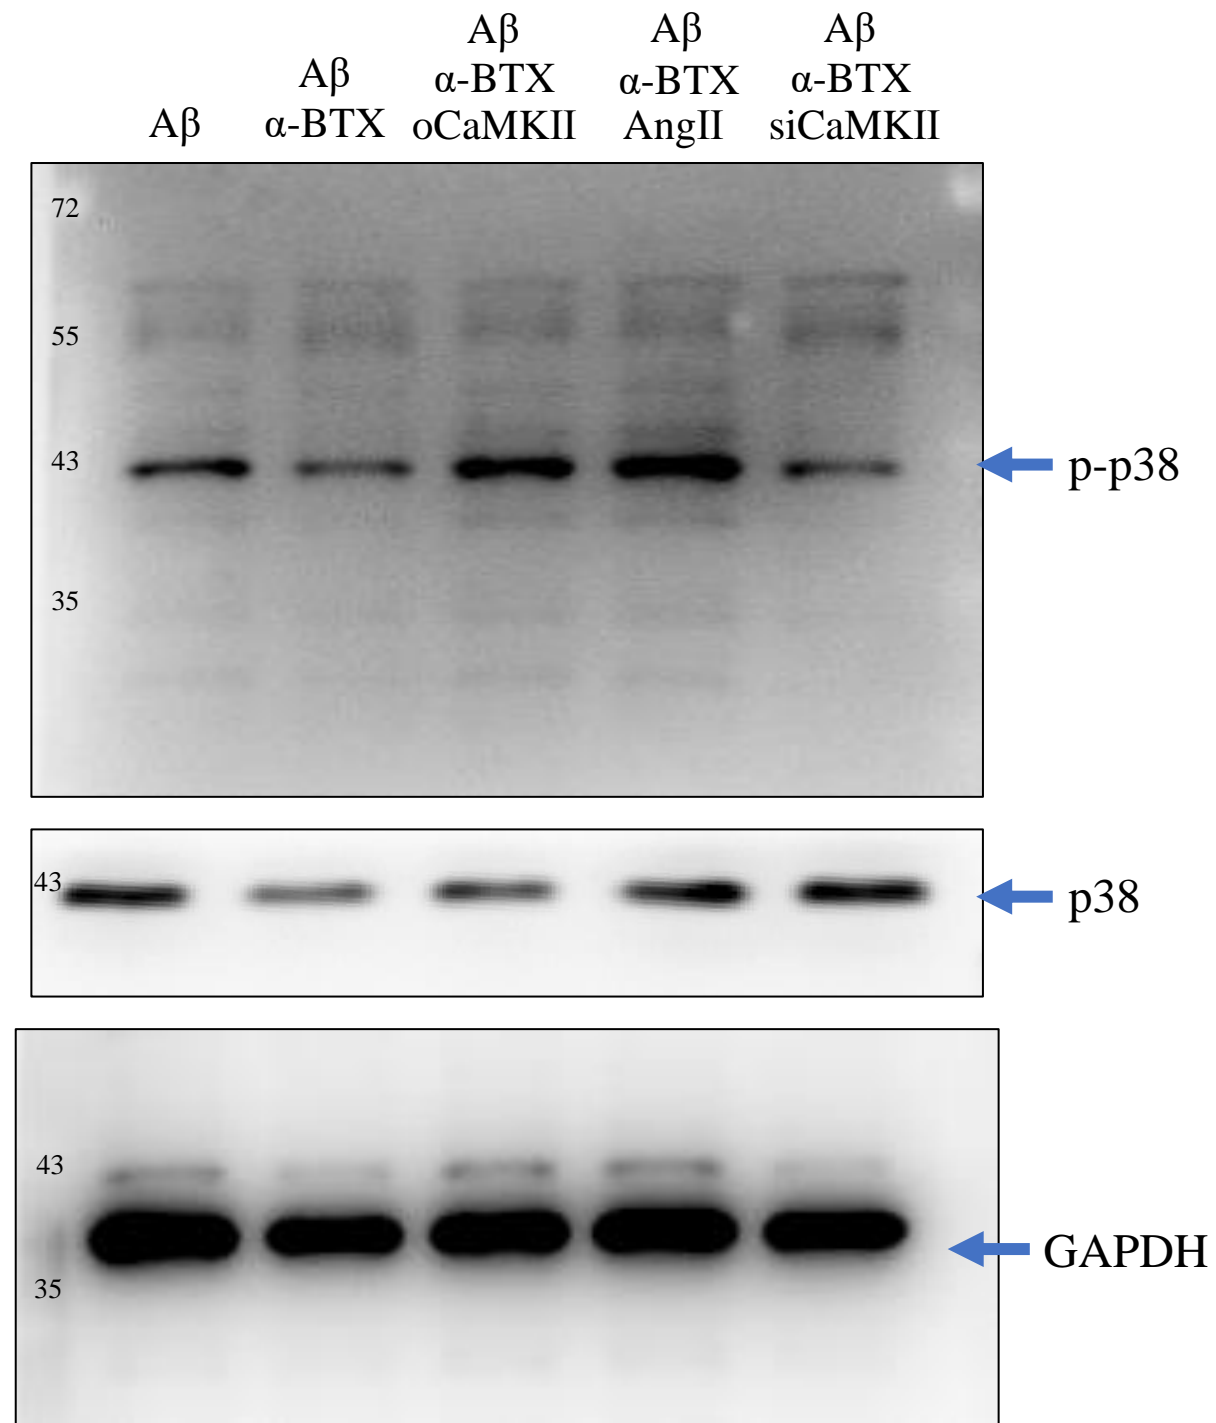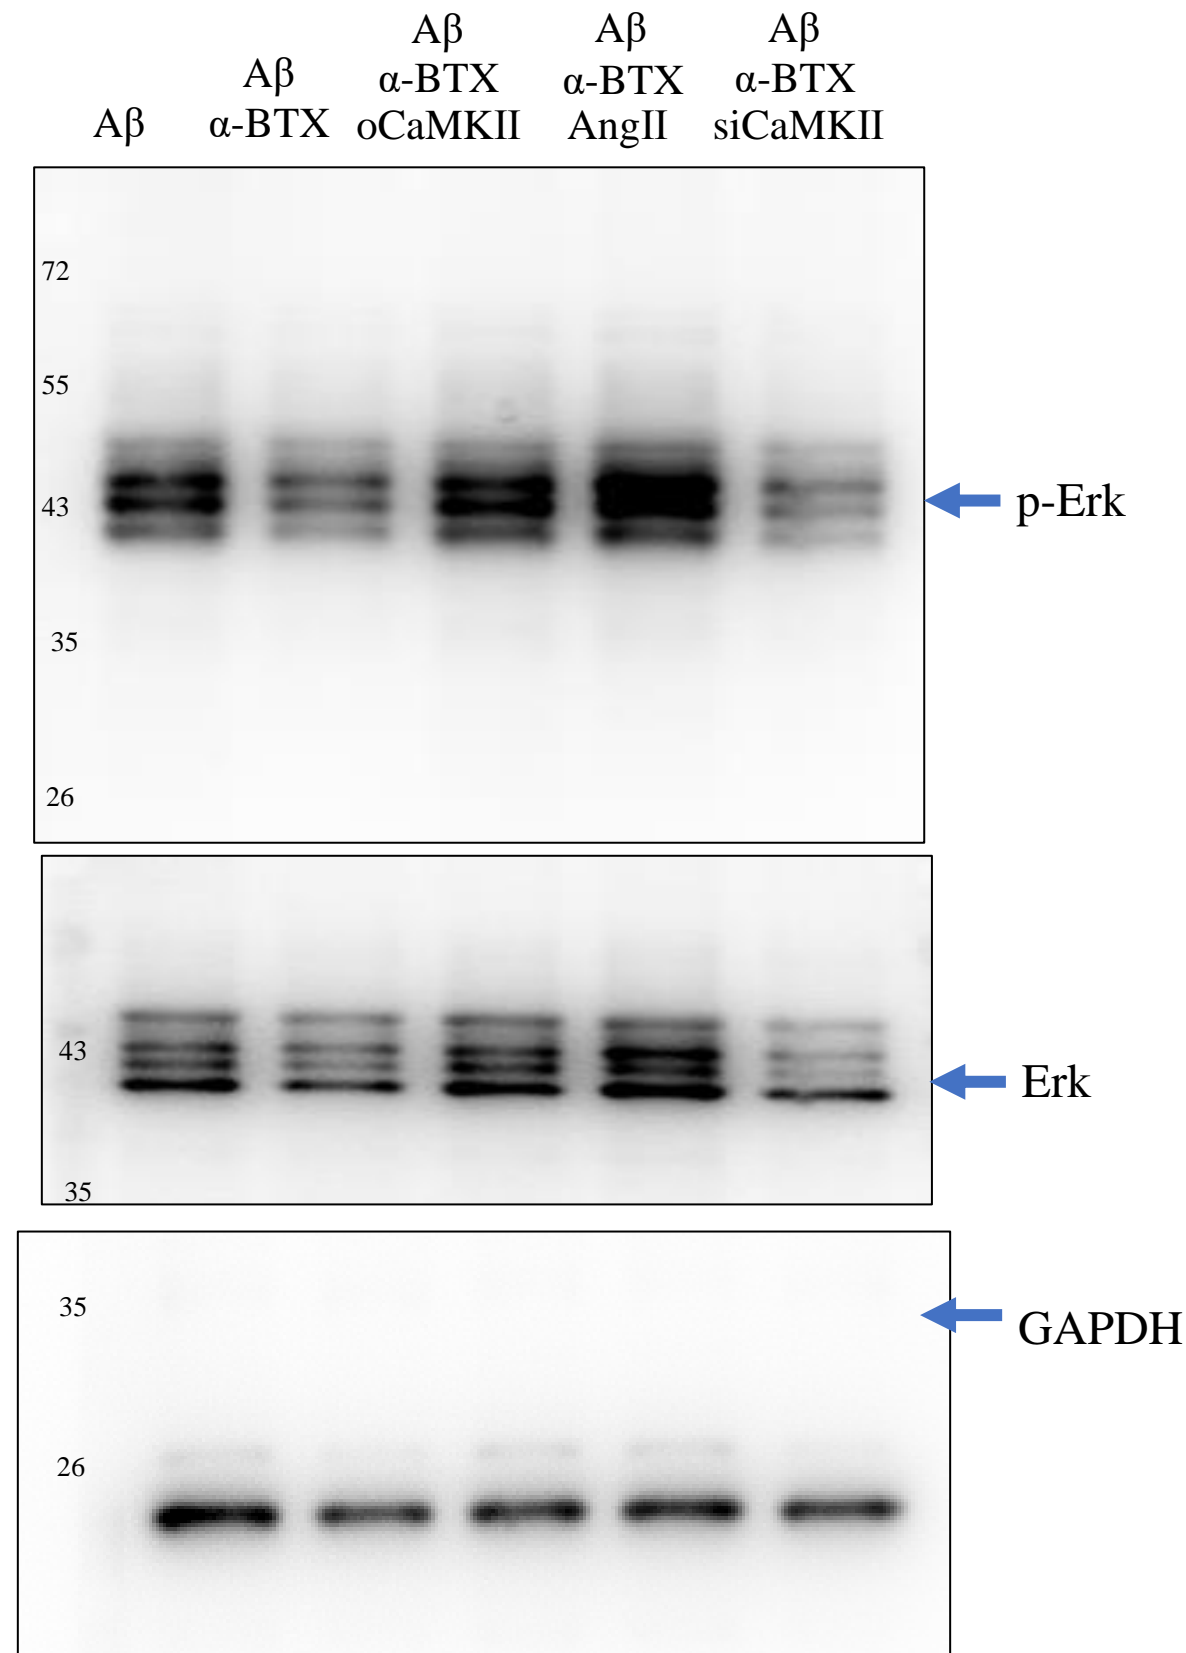

# Fig.5A

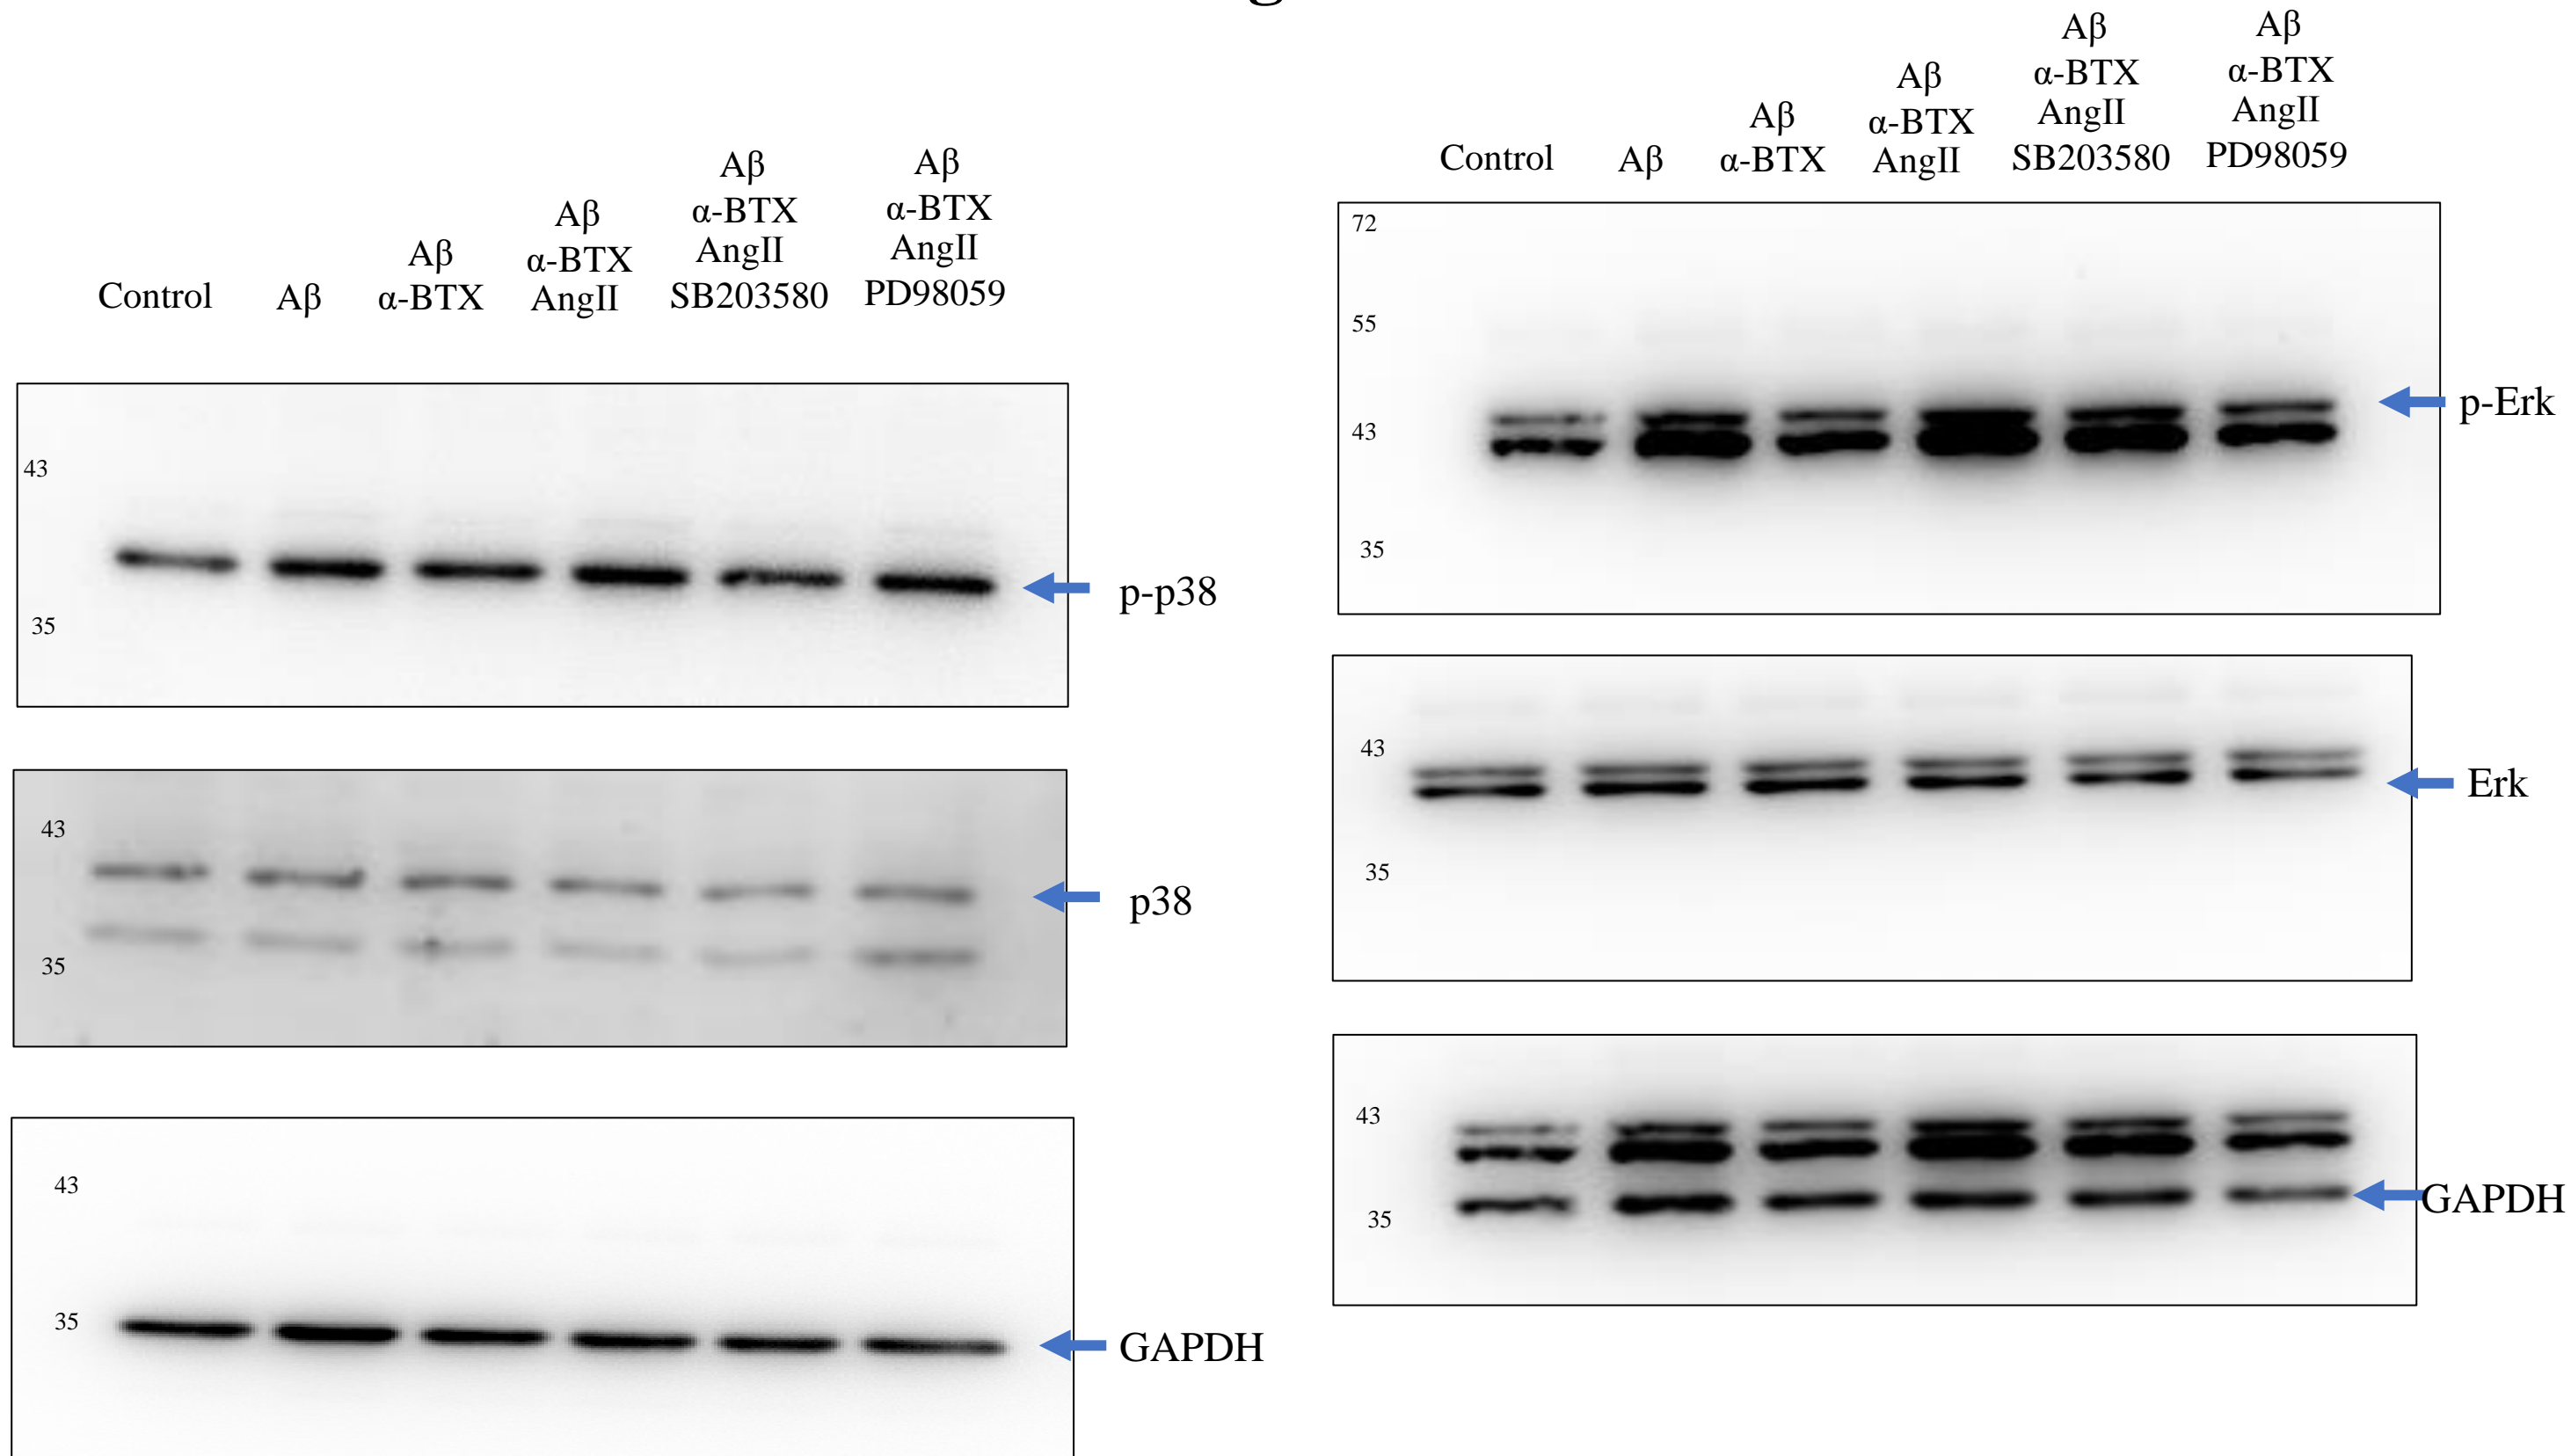

# Fig.5H

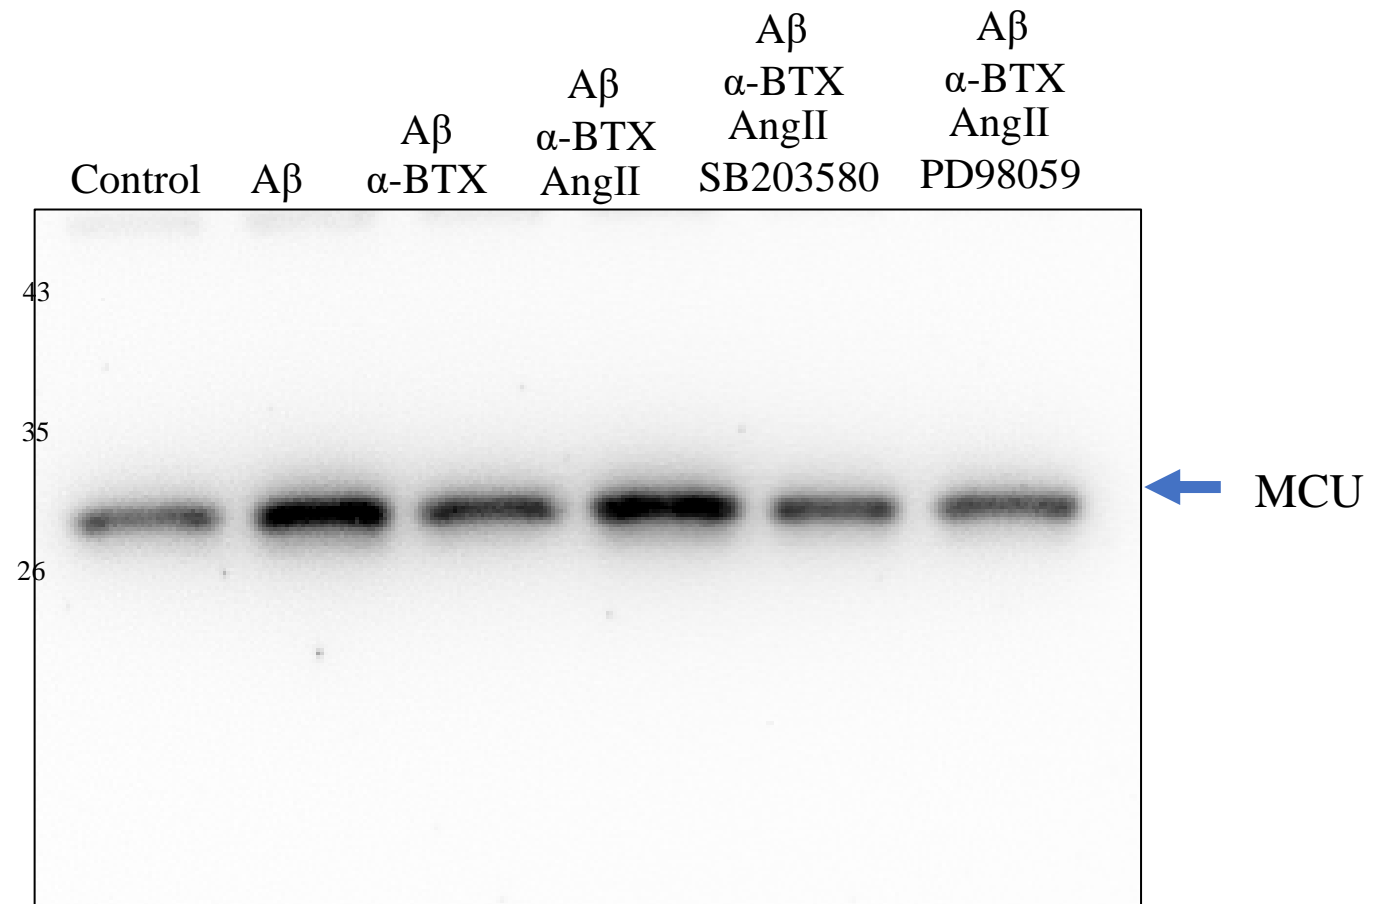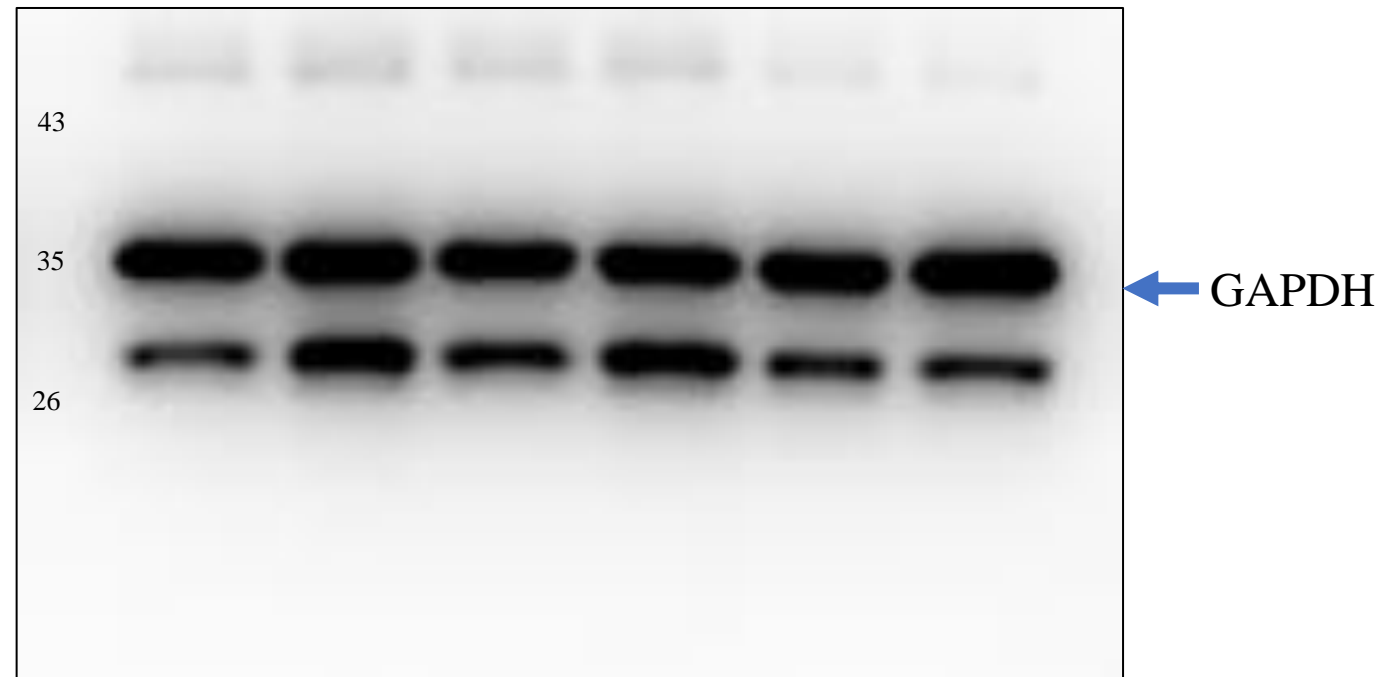



# Fig.5H

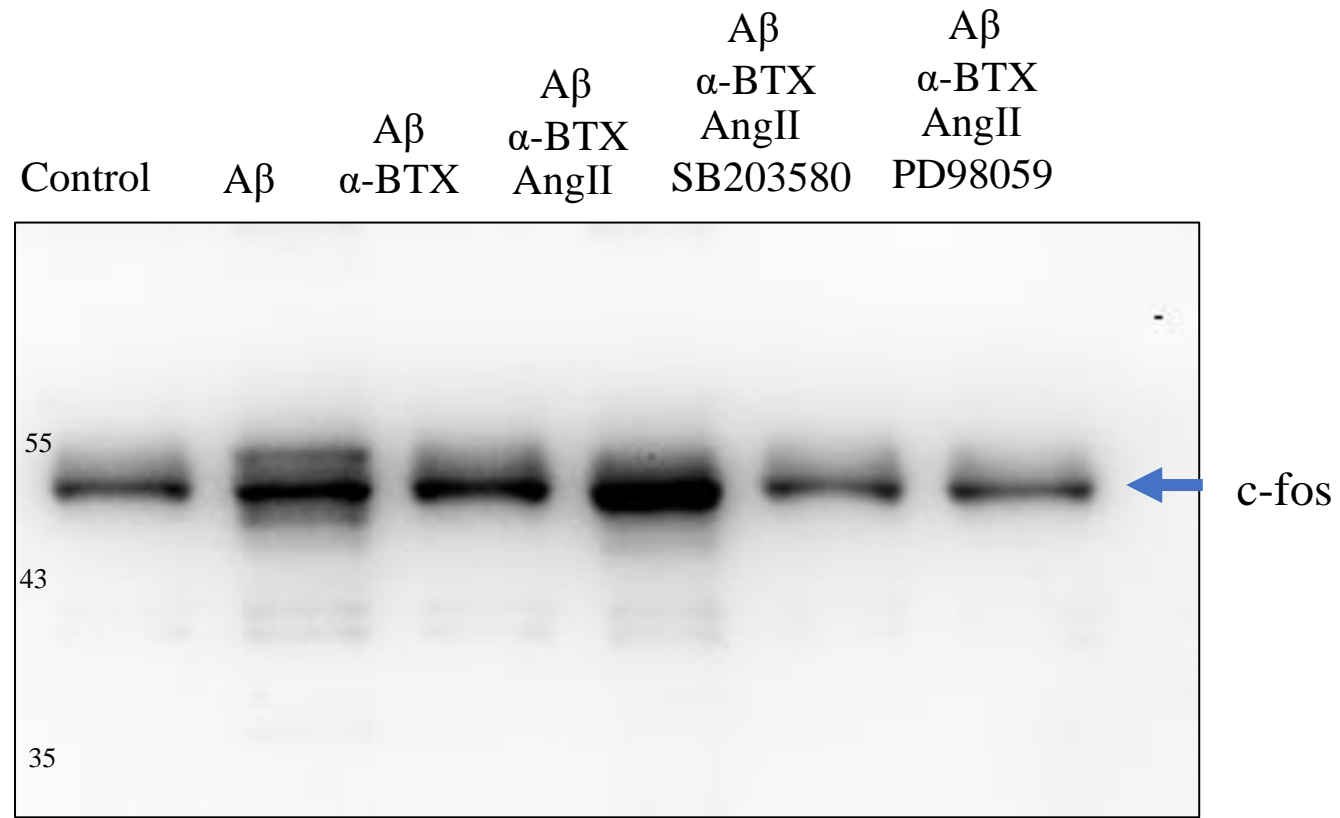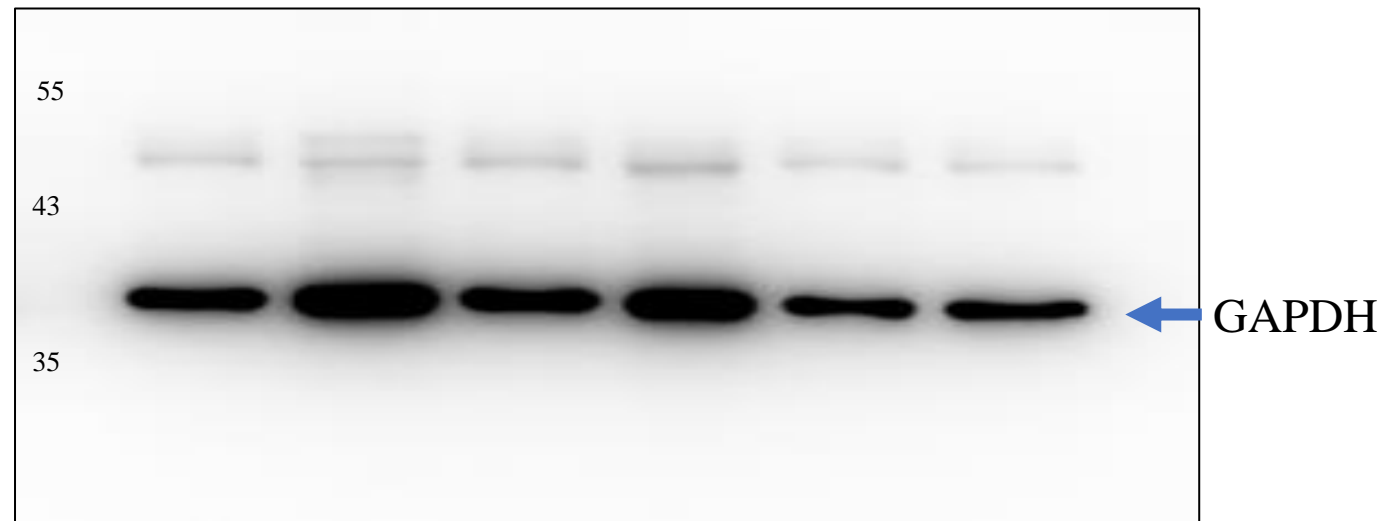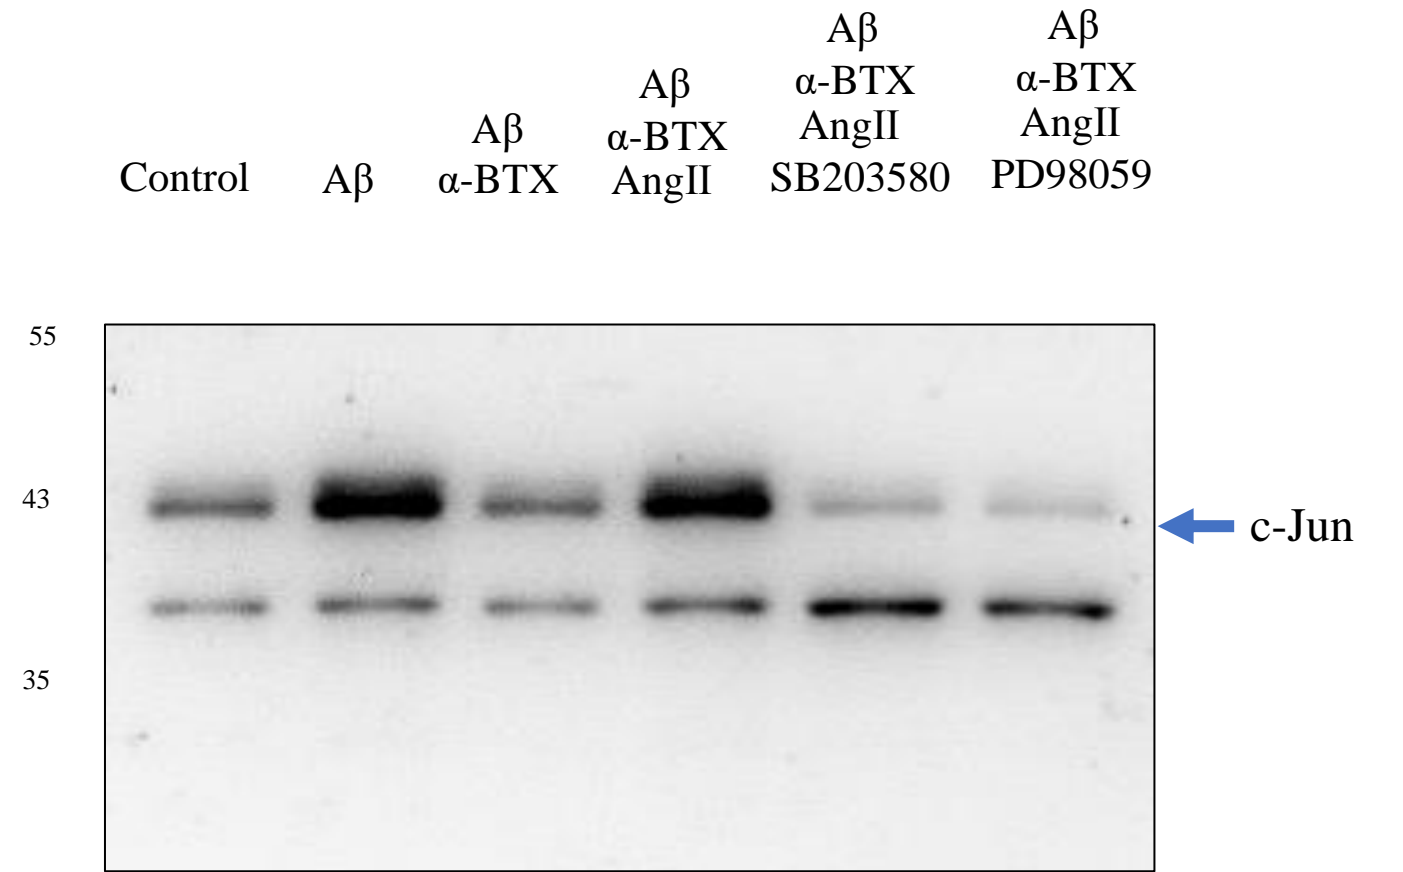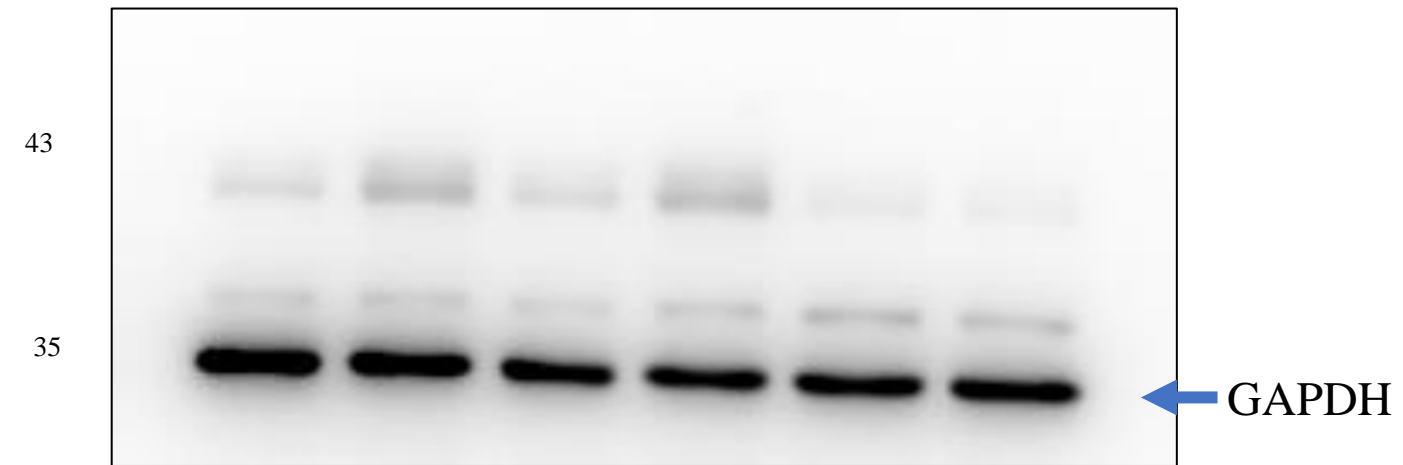

# Fig.6A

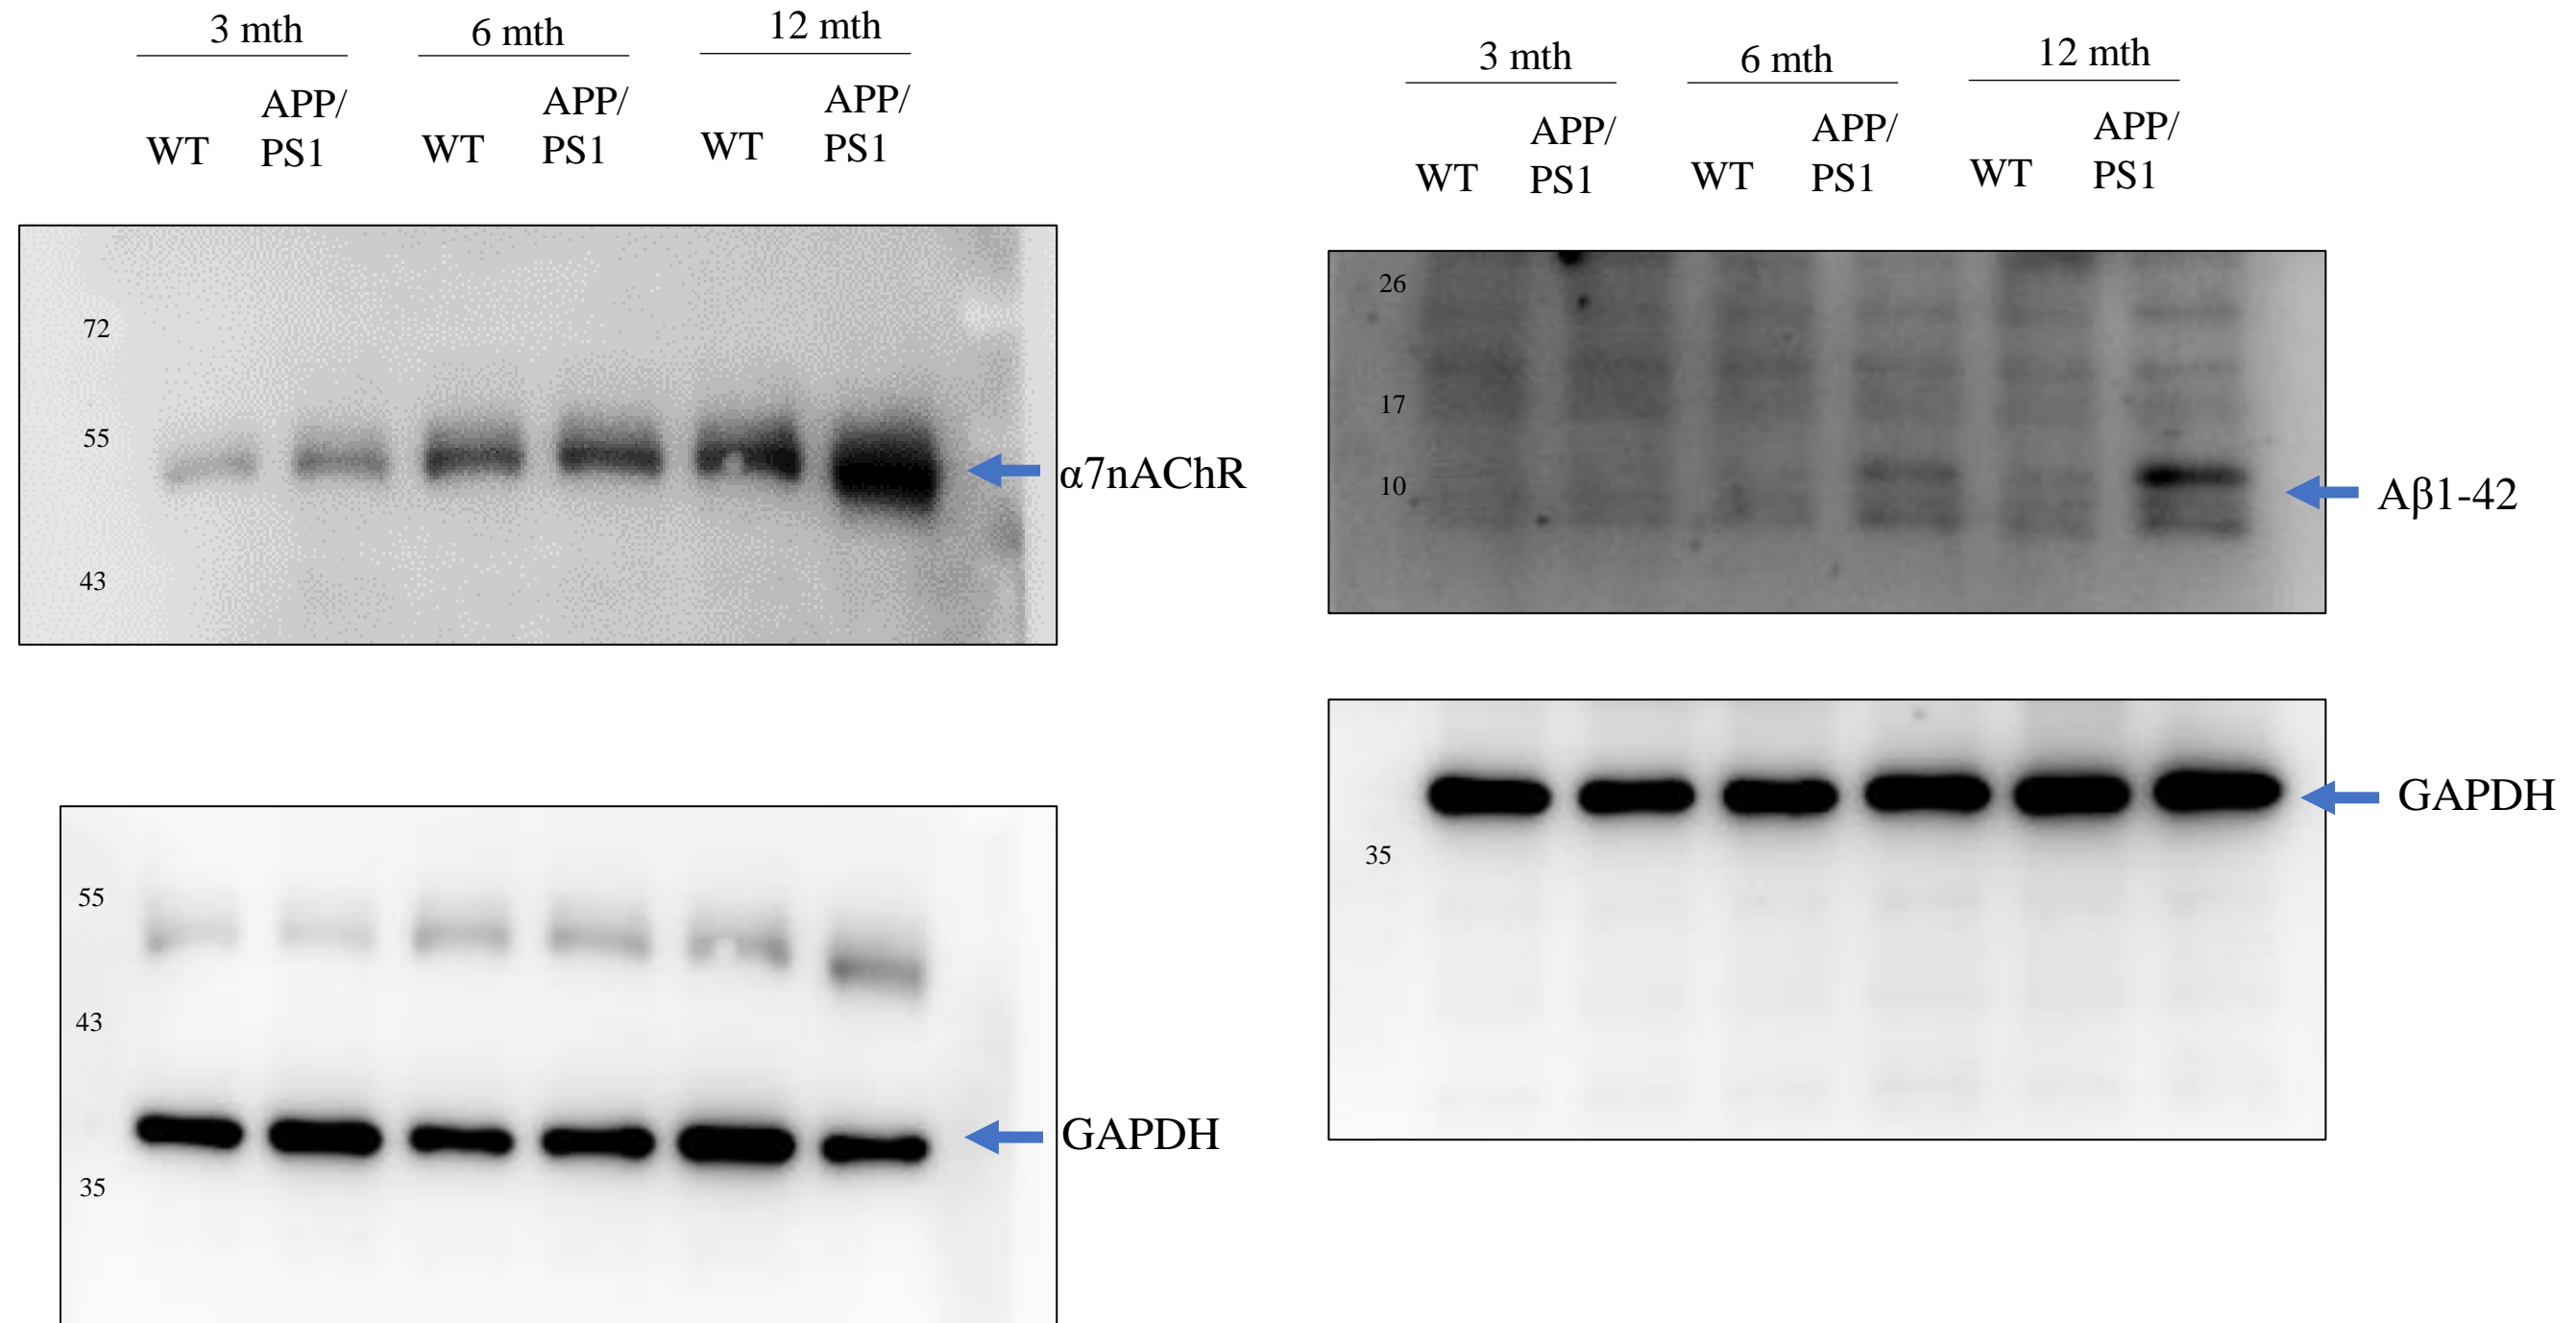

# Fig.6D

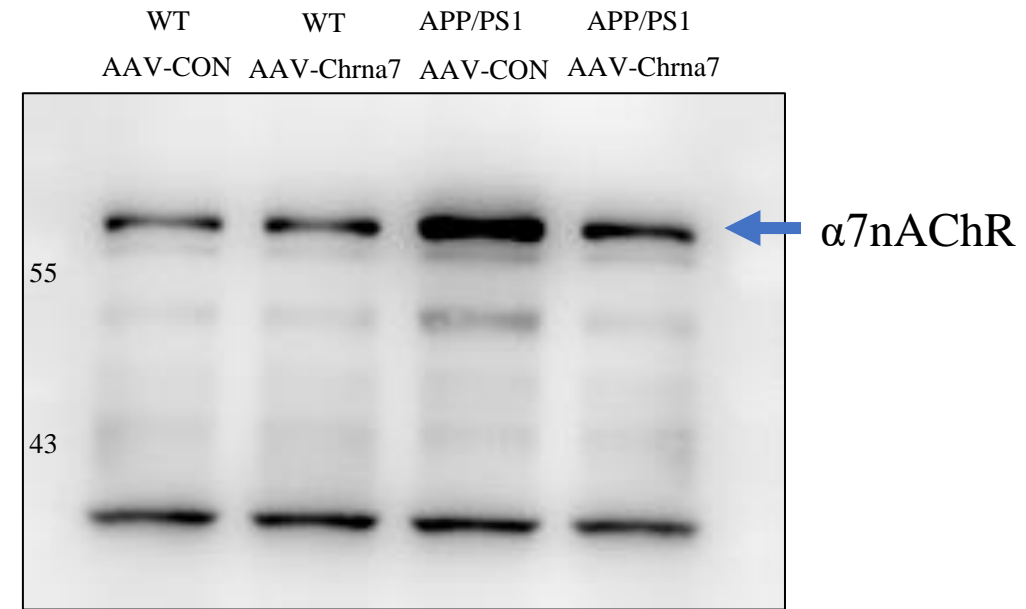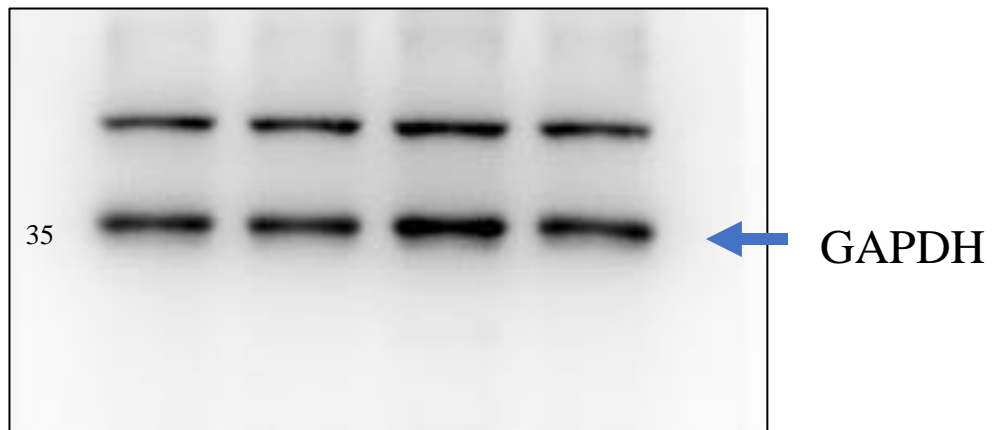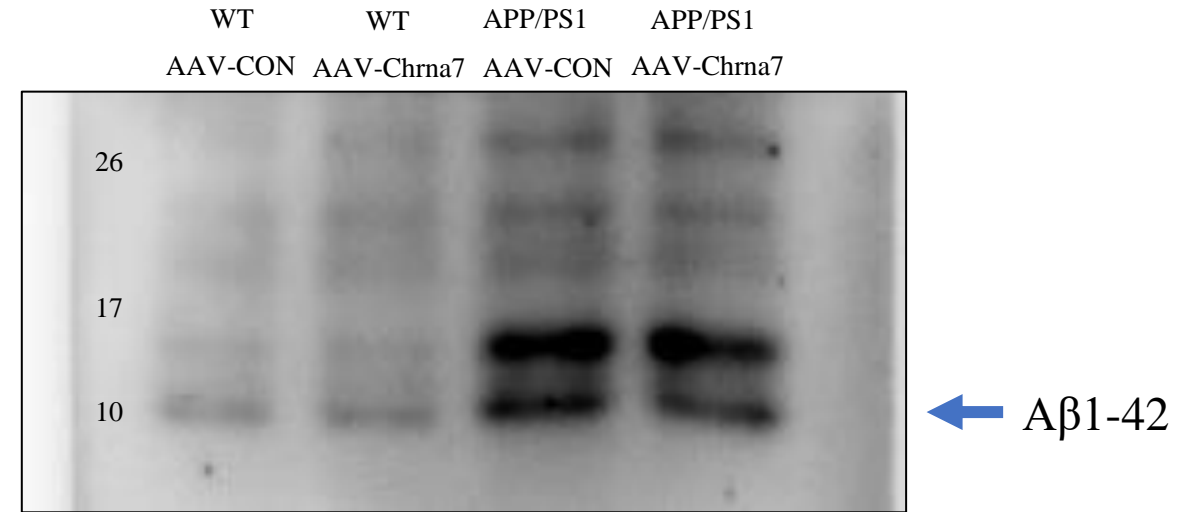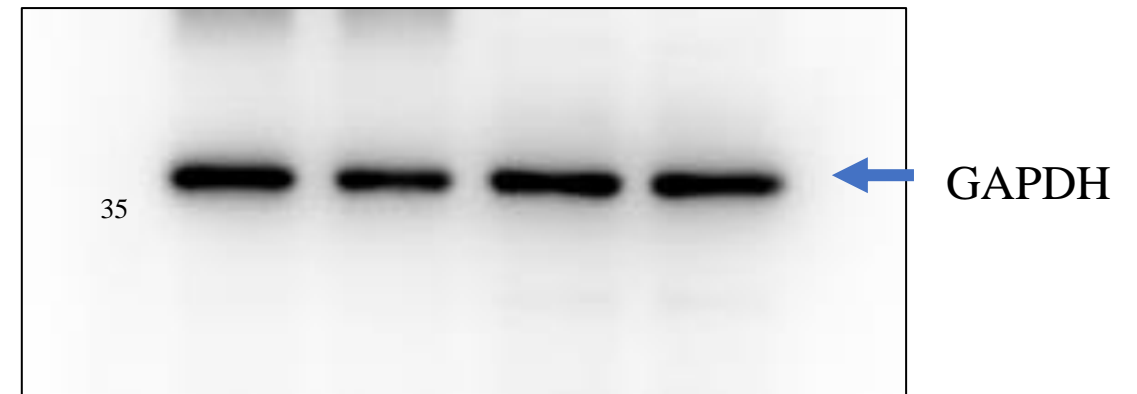

# Fig.8I-L

WT WT APP/PS1 APP/PS1  
AAV-CON AAV-Chrna7 AAV-CON AAV-Chrna7

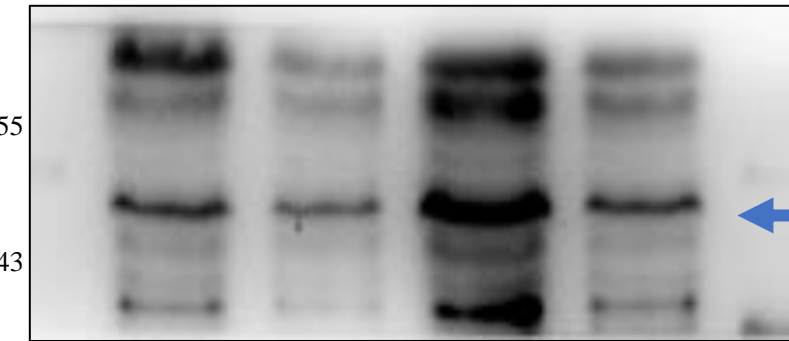

oxi-CaMKII

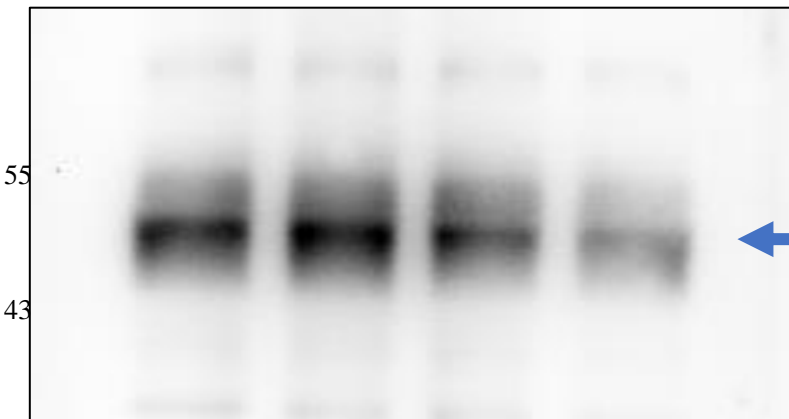

t-CaMKII

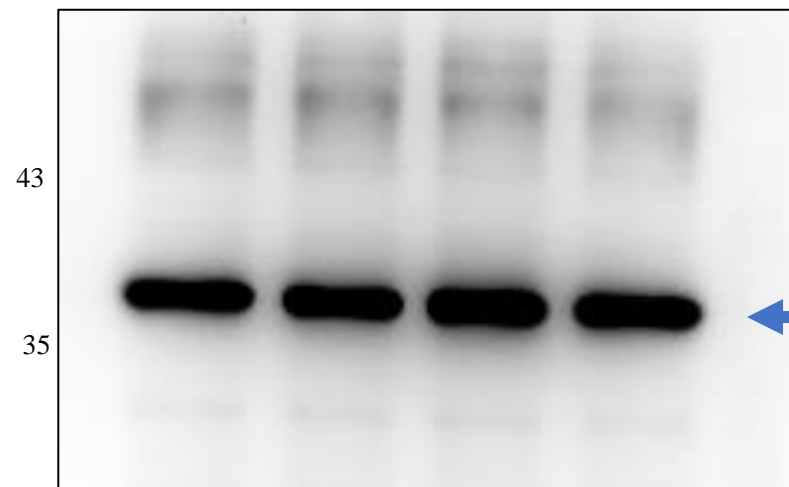

GAPDH

WT WT APP/PS1 APP/PS1  
AAV-CON AAV-Chrna7 AAV-CON AAV-Chrna7

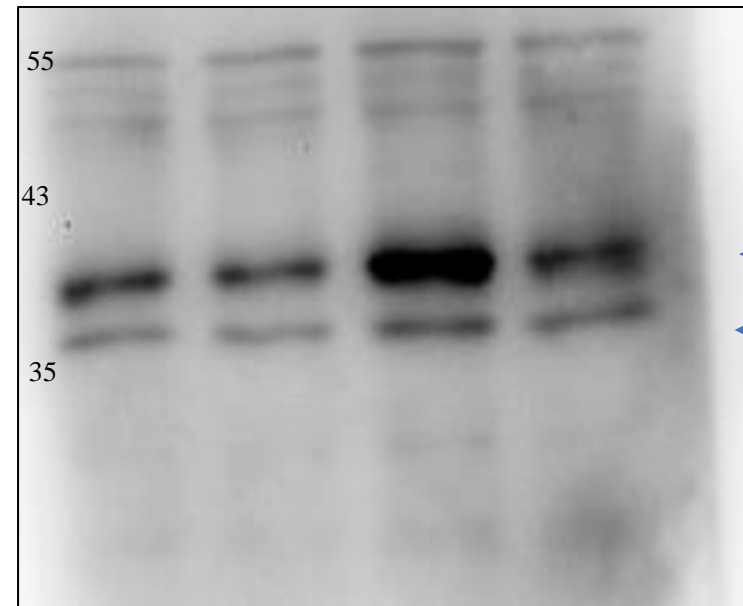

p-p38

GAPDH

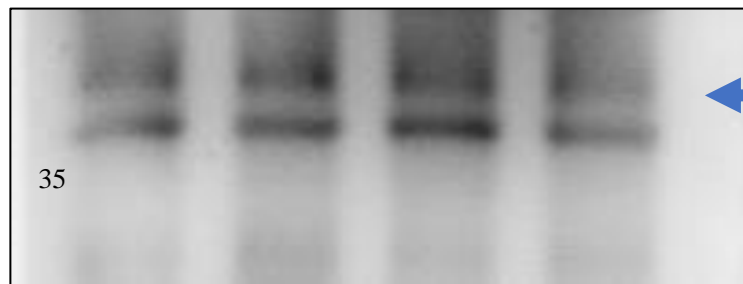

p38

WT WT APP/PS1 APP/PS1  
AAV-CON AAV-Chrna7 AAV-CON AAV-Chrna7

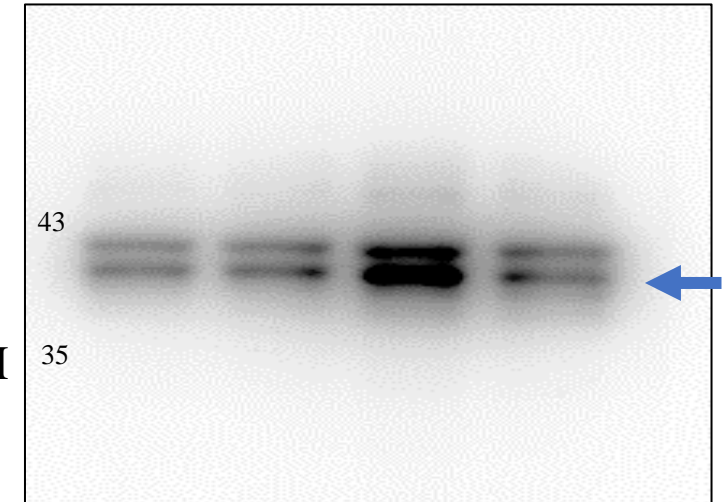

p-Erk

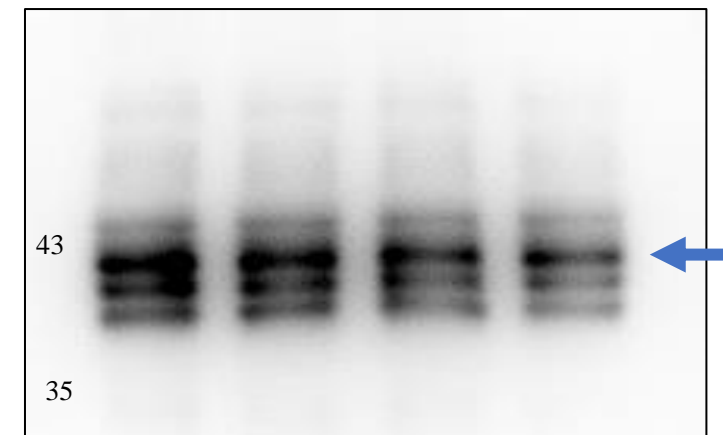

Erk

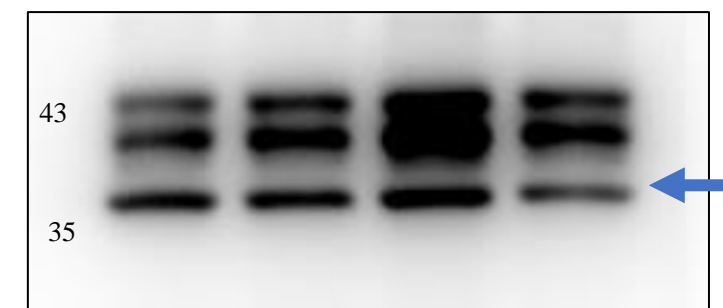

GAPDH

# Fig.80

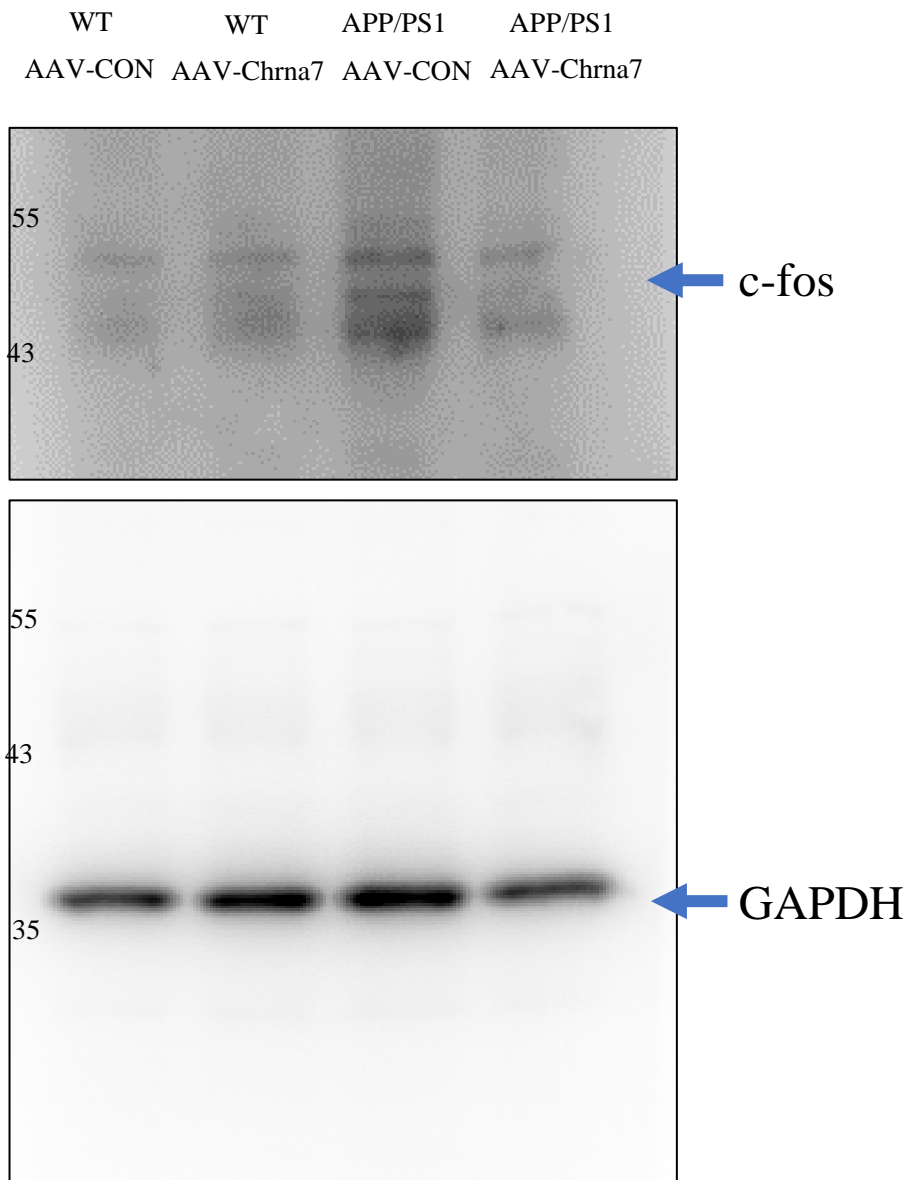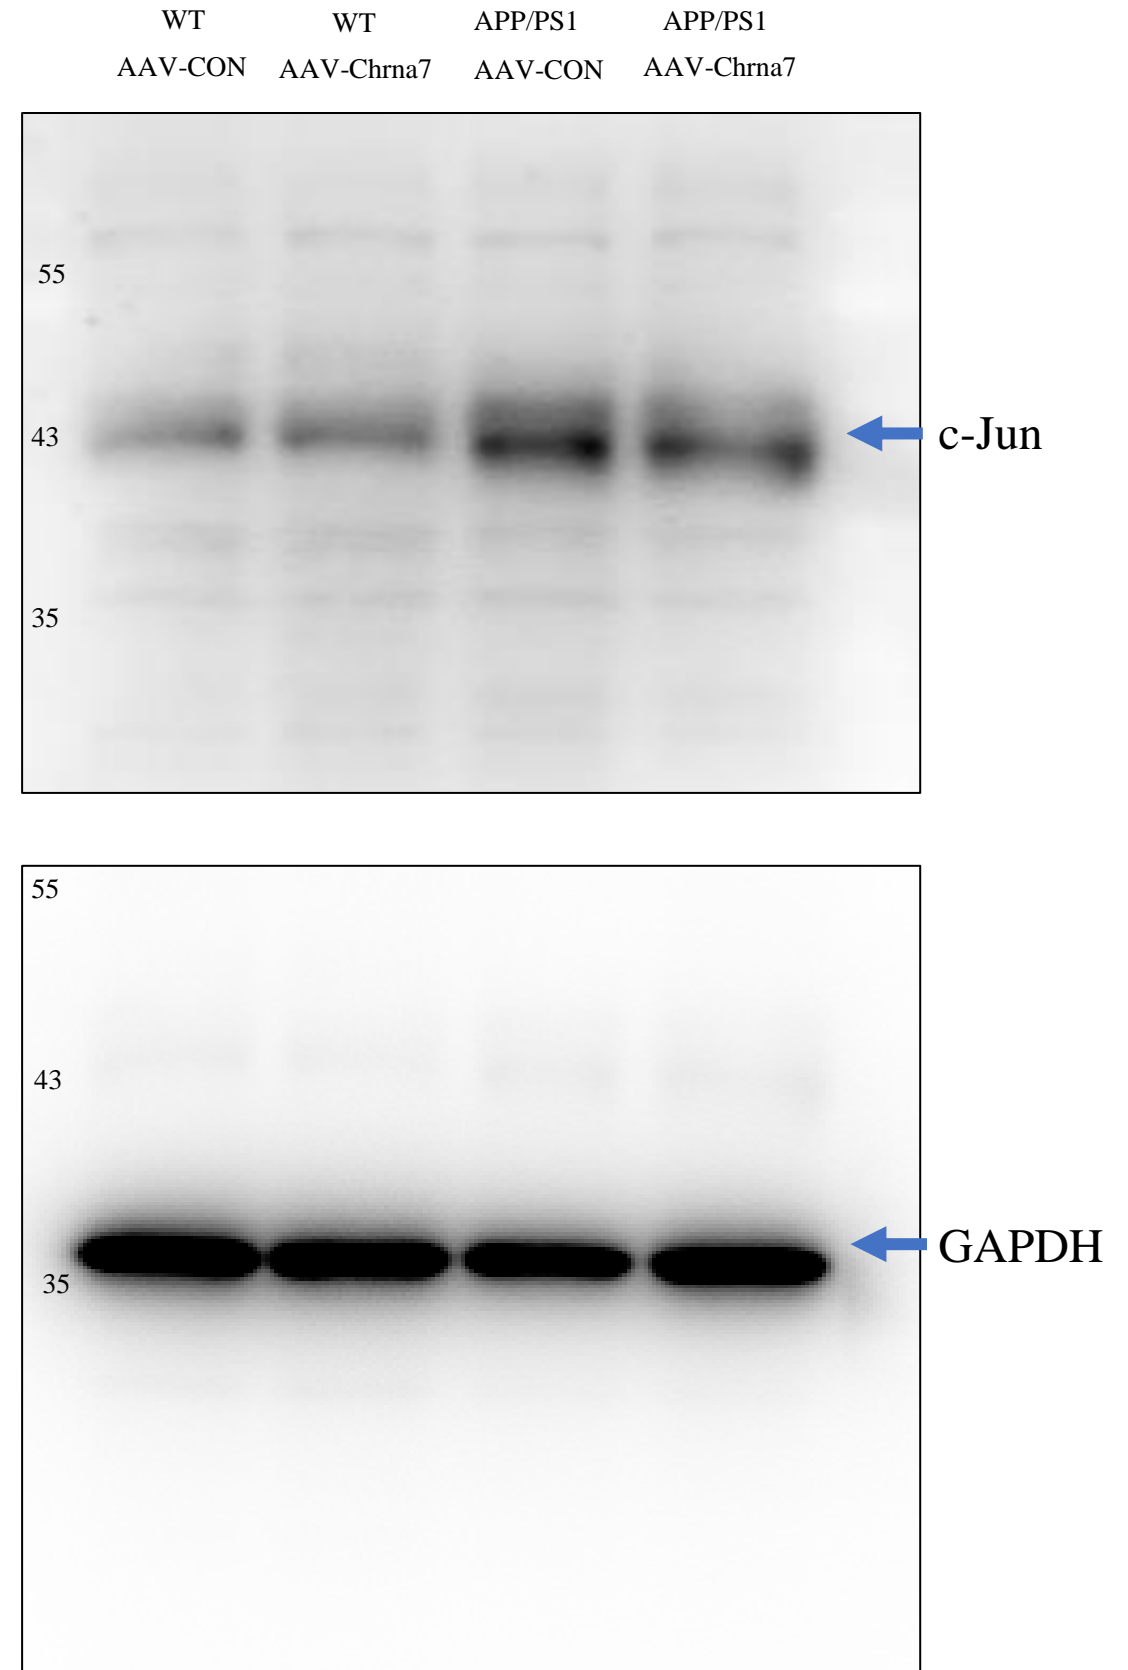

Supplement: mmc1.pdf [file mmc1.pdf]
